1  
2  
3  
4  
5  
6  
7  
8  
9  
10  
11  
12  
13  
14  
15  
16  
17  
18  
19  
20  
21  
22  
23  
24

**Feasibility of intranasal delivery of thin-film freeze-dried, mucoadhesive AS01B-  
adjuvanted vaccine powders**

Yu-Sheng Yu<sup>1,5</sup>, Khaled AboulFotouh<sup>1</sup>, Gerallt Williams<sup>2</sup>, Julie Suman<sup>2</sup>, Chris Cano<sup>3</sup>,  
Zachary N. Warnken<sup>4</sup>, Robert O. Williams III<sup>1</sup>, Zhengrong Cui<sup>1\*</sup>.

1. The University of Texas at Austin, College of Pharmacy, Division of Molecular  
Pharmaceutics and Drug Delivery, Austin, Texas, USA
2. Aptar Pharma, Le Vaudreuil, France
3. TFF Pharmaceuticals, Inc. Fort Worth, TX, USA
4. Via Therapeutics, Inc. Austin, Texas, USA
5. National Taiwan University, Department of Chemical Engineering, Taipei, Taiwan

\* Correspondence should be sent to: [Zhengrong.cui@austin.utexas.edu](mailto:Zhengrong.cui@austin.utexas.edu)

25 **Abstract**

26 Intranasal vaccination by directly applying a vaccine dry powder is appealing. However, a  
27 method that can be used to transform a vaccine from a liquid to a dry powder and a device  
28 that can be used to administer the powder to the desired region(s) of the nasal cavity are  
29 critical for a successful intranasal vaccination. In the present study, using a model vaccine  
30 that contains the liposomal AS01<sub>B</sub> as an adjuvant and ovalbumin (OVA) as a model antigen,  
31 it was shown that thin-film freeze-drying can be applied to convert the liquid vaccine  
32 containing sucrose at a sucrose to lipid ratio of 15:1 (w/w), in the presence or absence of  
33 carboxymethyl cellulose sodium salt (CMC) as a mucoadhesive agent, into dry powders.  
34 Ultimately, the thin-film freeze-dried AS01<sub>B</sub>/OVA vaccine powder containing 1.9% w/w  
35 of CMC (i.e., TFF AS01<sub>B</sub>/OVA/CMC<sub>1.9%</sub> powder) was selected for additional evaluation  
36 because the TFF AS01<sub>B</sub>/OVA/CMC<sub>1.9%</sub> powder was mucoadhesive and maintained the  
37 integrity of the antigen and the physical properties of the vaccine. Compared to the TFF  
38 AS01<sub>B</sub>/OVA powder that did not contain CMC, the TFF AS01<sub>B</sub>/OVA/CMC<sub>1.9%</sub> powder had  
39 a lower moisture content and a higher glass transition temperature and was more porous.  
40 In addition, the TFF AS01<sub>B</sub>/OVA/CMC<sub>1.9%</sub> thin films were relatively thicker than the TFF  
41 AS01<sub>B</sub>/OVA thin films without CMC. When sprayed with the Unit Dose System Powder  
42 (UDSP) nasal device, the TFF AS01<sub>B</sub>/OVA powder and the TFF AS01<sub>B</sub>/OVA/CMC<sub>1.9%</sub>  
43 powder generated similar particle size distribution curves, spray patterns, and plume  
44 geometries. Importantly, after the TFF AS01<sub>B</sub>/OVA/CMC<sub>1.9%</sub> powder was sprayed with the  
45 UDSP nasal device, the integrity of the OVA antigen and the AS01<sub>B</sub> liposomal adjuvant did  
46 not change. Finally, a Taguchi L8 orthogonal array was applied to identify the optimal  
47 parameters for using the UDSP device to deliver the TFF AS01<sub>B</sub>/OVA/CMC<sub>1.9%</sub> vaccine  
48 powder to the middle and lower turbinate and the nasopharynx regions in both adult and

49 child nasal casts. Results from this study showed that it is feasible to apply the TFF  
50 technology to transform a nasal vaccine candidate from liquid to a dry powder and then  
51 use the UDSP nasal device to deliver the TFF vaccine powder to the desired regions in the  
52 nasal cavity for intranasal vaccination.

53

54 **Keywords:** Vaccine, powder, freeze-drying, pediatric vs. adult, deposition, intranasal

55

56

57

58

59

60

61

62

63

64

65

66

67

68

69

70

71

72

## 73 **1. Introduction**

74 Intranasal vaccination is an attractive, non-invasive route of vaccine administration.  
75 Intranasal vaccine can induce specific immune responses not only systemically, but also in  
76 the mucosal secretions of the respiratory tract (Birkhoff et al., 2009), which is advantageous  
77 as many pathogens infect their hosts through the respiratory tract (Chavda et al., 2021). In  
78 fact, several nasal vaccines have been approved for human use around the world, including  
79 the FluMist Quadrivalent in the United States (US) (Suryadevara and Domachowske,  
80 2014), Fluenz Tetra in the European Union (EU) (Gasparini et al., 2021), NASOVAC-S in  
81 India (Ortiz et al., 2015), a freeze-dried nasal live influenza vaccine (Ganwu<sup>®</sup>) by the  
82 Changchun BCHT Biotechnology in China, and recently a nasal Coronavirus disease 2019  
83 (COVID-19) vaccine by Bharat Biotech in India. Those nasal vaccines are live (attenuated)  
84 influenza virus-based or adenovirus-based and are presented as a liquid suspension or a  
85 freeze-dried powder for reconstitution. The liquid vaccine suspension is then administered  
86 intranasally using a nasal sprayer. Intranasal administration of vaccine directly as a dry  
87 powder has advantages, including ease of storage and distribution (Flood et al., 2016),  
88 extended residence time in the nasal cavity, and a higher dose of vaccine that can be  
89 administered. Unfortunately, vaccine dry powders with the proper aerosol properties for  
90 deposition in the desired region(s) in the nasal cavity and a method to prepare the dry  
91 powders remain needed.

92

93 Thin-film freeze-drying is a bottom-up dry powder engineering technology. It involves the  
94 ultra-rapid thin-film freezing (TFF) of a liquid (e.g., solution, suspension, or emulsion) on  
95 a cryogenically cooled solid surface (Engstrom et al., 2008; Overhoff et al., 2009). The  
96 liquid is dropped as droplets (e.g., 2 mm in diameter) from about 1 cm to 10 cm above the

97 cryogenically cooled solid surface. Upon impact onto the cooled surface, the droplet  
98 rapidly spreads into a thin film, which is then frozen into a thin film. Solvent such as water  
99 in the frozen thin films is removed by lyophilization. Dry powder engineering using the  
100 TFF technology is advantageous over other similar dry powder engineering technologies  
101 such as conventional shelf freeze-drying, spray drying, and spray freeze-drying in that it  
102 avoids or minimizes shear stress and heat stress, while generating powders that are  
103 generally highly porous, brittle (Hufnagel et al., 2022), and having large specific surface  
104 area (Wang et al., 2021), making them potentially feasible for directly intranasal  
105 administration. Conversely, the TFF process is associated with a relative larger liquid-solid  
106 interface between the liquid droplets and the cryogenically cooled solid surface. Previously,  
107 it has been shown that the TFF technology can be applied to produce dry powders of  
108 various vaccines, including vaccines adjuvanted with aluminum salts (Alzhrani et al., 2021;  
109 Li et al., 2015; Thakkar et al., 2018), (nano)emulsions such as MF59 or AddaVax  
110 (AboulFotouh et al., 2022a), and liposomes such as AS01<sub>B</sub> (AboulFotouh et al., 2022b).

111

112 Herein, a model vaccine comprised of ovalbumin (OVA) as a model antigen and the  
113 liposomal AS01<sub>B</sub> as an adjuvant was used to test the feasibility of using the TFF technology  
114 to prepare dry powder vaccines for direct intranasal administration. All currently approved  
115 human nasal vaccines are virus-based and do not contain any adjuvant. The AS01<sub>B</sub> was  
116 chosen in this study because a recent report from our group showed that AS01<sub>B</sub>-containing  
117 vaccines can be converted to dry powders by TFF (AboulFotouh et al., 2022b). Results  
118 from a recent study have demonstrated the safety and efficacy of AS01<sub>B</sub> as a potential nasal  
119 vaccine adjuvant in a mouse model (Sato-Kaneko et al., 2022). Moreover, one can find in  
120 the literature intranasal immunization studies wherein the vaccines contain either

121 monophosphoryl lipid A (MPL) or QS21 as the adjuvant (Baldrige et al., 2000; Sasaki et  
122 al., 1998a; Sasaki et al., 1998b), and the liposomal AS01<sub>B</sub> contains both MPL and QS21.

123

124 To increase the residence time of the vaccine in the nasal cavity, various mucoadhesive  
125 agents have been included in the vaccine formulation, and their effect on the vaccine was  
126 studied. The mucoadhesive agents studied include chitosan, sodium alginate, gelatin, and  
127 sodium carboxymethylcellulose (CMC), each with its own unique mechanism(s) of  
128 interaction with the mucosa (Dekina et al., 2016; Grabovac et al., 2005; Kesavan et al.,  
129 2010; Sogias et al., 2008). A challenge is that the mucoadhesive agent can interact with the  
130 AS01<sub>B</sub>/OVA vaccine and change the structure of the AS01<sub>B</sub>, the antigen, and/or the vaccine.

131 Therefore, the effect of the mucoadhesive agents on the AS01<sub>B</sub>/OVA vaccine before and  
132 after being subjected to thin-film freeze-drying with sucrose as an excipient was studied.

133 One of the mucoadhesive agents at a concentration that showed no detectable effect on the  
134 physical properties of the AS01<sub>B</sub>/OVA vaccine was chosen for further characterization.

135 Aptar's unit dose system powder (UDSP) nasal device was used to characterize the particle  
136 size distribution, spray pattern, and plume geometry of selected AS01<sub>B</sub>/OVA vaccine

137 powders upon actuation. Finally, the deposition patterns of a selected AS01<sub>B</sub>/OVA vaccine  
138 powder following actuation using the UDSP nasal device into 3D printed nasal casts based

139 on the CT-scan images of the noses of an adult and a child were evaluated to predict the  
140 feasibility of using the UDSP nasal device to deliver thin-film freeze-dried vaccine

141 powders (TFF vaccine powders) directly into the posterior nasal cavity and the  
142 nasopharynx regions of human nasal cavity (Warnken et al., 2018). Unlike in infants, in

143 children older than two years and in adults, the Waldeyer's ring in the naso-oropharynx  
144 region is the key lymphoid tissue in the nasal cavity (Davis, 2001; Debertain et al., 2003).

145 Therefore, for an intranasal vaccine to induce specific immune responses, the vaccine  
146 needs to be delivered either directly to the nasopharynx region or to the posterior nasal  
147 cavity and then move by means of ciliary clearance to the naso-oropharynx region  
148 following the mucous blanket posterior movement. Within the posterior nasal cavity,  
149 delivery of the vaccine to the upper turbinate region, where the olfactory bulb resides,  
150 should be avoided or minimized to reduce the access of the vaccine to the brain via the  
151 olfactory nerves (Cai et al., 2022; Xu et al., 2021b).

152

153

154

155

156

157

158

159

160

161

162

163

164

165

166

167

168

## 169 **2. Materials and Methods**

170

### 171 **2.1. Materials**

172 Albumin from chicken egg white (ovalbumin, OVA), chitosan medium molecular weight,  
173 sodium alginate, gelatin, CMC, MPL from *Salmonella enterica* serotype minnesota Re 595  
174 (Re mutant), porcine mucin type III, and 2-mercaptoethanol were from Sigma-Aldrich (St.  
175 Louis, MO). QS-21 was from Dessert King International (San Diego, CA). Sucrose was  
176 from Millipore (Billerica, MA). Anhydrous ethanol (EtOH) was from Decon Labs (King  
177 of Prussia, PA). Cholesterol was from MP Biomedicals (Santa Ana, CA). The 1,2-dioleoyl-  
178 sn-glycero-3-phosphocholine (DOPC) was from Avanti Polar Lipids, Inc. (Alabaster, AL).  
179 Fluorescein isothiocyanate isomer I (FITC) was from Acros Organics (Geel, Belgium).  
180 Dulbecco's phosphate-buffered saline (DPBS, pH 7.0-7.3, 9.5 mM) was from Gibco  
181 (Grand Island, NY). Laemmli sample buffer 4× and Coomassie G-250 were from Bio-Rad  
182 (Hercules, CA). Blue prestained protein standard was from New England Biolabs (Ipswich,  
183 MA). Artificial nasal mucus was from Biochemazone (Leduc, Alberta, Canada).  
184 HYDRANAL™ - Coulomat AG was from Honeywell (Charlotte, NC). The UDSP nasal  
185 device was kindly donated by AptarGroup, Inc. (Crystal Lake, IL). All chemicals were used  
186 as received without further purification.

187

### 188 **2.2. Preparation of the AS01<sub>B</sub>/OVA model vaccine**

189 To prepare the AS01<sub>B</sub>/OVA model vaccine, the liposomal adjuvant was prepared first as  
190 described before (AboulFotouh et al., 2022b). Briefly, 4.0 mg of DOPC, 1.0 mg of  
191 cholesterol, and 0.2 mg of MPL were dissolved with 1.25 mL of EtOH in a 20 mL glass  
192 vial. A lipid membrane was formed in the vial by evaporating the ethanol under gentle



193 nitrogen flow. Next, 0.5 mL of DPBS was added to the vial to rehydrate the lipids, and the  
194 mixture was stirred overnight at room temperature. The final concentration of DOPC in the  
195 liposome suspension was 8 mg/mL. The liposome suspension was sonicated with a probe  
196 sonicator (Qsonica Q700) until the particle size reached about 100 nm based on dynamic  
197 light scattering (DLS). The AS01<sub>B</sub>/OVA model vaccine was prepared by adding 50 µg of  
198 QS-21, 50 µg of OVA, and 19.5 mg of sucrose to 125 µL of the liposome suspension, and  
199 the final volume was adjusted to 500 µL with DPBS.

200

### 201 ***2.3. Preparation of AS01<sub>B</sub>/OVA model vaccines with different mucoadhesive agents***

202 To prepare the AS01<sub>B</sub>/OVA model vaccine with different concentrations of chitosan,  
203 sodium alginate, gelatin, or CMC, 50 µg of QS-21, 50 µg of OVA, and 19.5 mg of sucrose  
204 were first added to 125 µL of liposome suspension. The stock solution of chitosan was  
205 prepared by dissolving chitosan in a 0.1 M acetic acid aqueous solution (2% w/v). The  
206 stock solutions of sodium alginate, gelatin, and CMC were prepared by dissolving them in  
207 DPBS (2% w/v). Different volumes of the solutions containing mucoadhesive agents were  
208 then added to the AS01<sub>B</sub>/OVA vaccine to achieve a final concentration of 0.1%, 0.2%, 0.4%,  
209 1%, w/v, corresponding to 1.9%, 3.7%, 7.2%, and 16.3% (w/w) of the mucoadhesive agents  
210 to the total weight of all components in the vaccine formulation except water. The final  
211 volume of the AS01<sub>B</sub>/OVA vaccines was then adjusted to 500 µL with DPBS.

212

### 213 ***2.4. Thin-film freeze-drying of the AS01<sub>B</sub>/OVA model vaccines***

214 The as-prepared AS01<sub>B</sub>/OVA vaccines, with or without mucoadhesive agents, were  
215 converted into dry powders by the TFF process. First, the liquid vaccines were frozen into  
216 small thin films following the reported single-vial TFF process (Xu et al., 2021a). Briefly,

217 a 20 mL glass vial was placed on dry ice until the temperature reached equilibrium. The  
218 liquid vaccine was added dropwise with a BD 1 mL syringe with a 21G needle to the bottom  
219 of the vial to form frozen thin films. The frozen films were then freeze-dried in a lyophilizer  
220 (SP VirTis AdVantage Pro). The lyophilization cycle was -40°C for 20 h, gradually ramping  
221 from -40°C to 25°C in 20 h, and then 25°C for 20 h. The chamber pressure was maintained  
222 at 80 mTorr. After lyophilization, the vials were backfilled with nitrogen gas, capped,  
223 crimped, and stored at room temperature.

224

### 225 ***2.5. Determination of particle size and zeta potential***

226 A Malvern Nano ZS (Westborough, MA) was used to measure the particle size and zeta  
227 potential of the liposomes and the vaccines. The vaccine powder was reconstituted with  
228 deionized water (DI water) at a volume identical to the volume of the liquid vaccine before  
229 it was subjected to TFF. Samples were diluted 50 times with DPBS. The final pH value of  
230 all the samples was approximately 7.2 to 7.4.

231

### 232 ***2.6. Evaluation of the integrity of the OVA and the liposome***

233 Sodium dodecyl sulfate–polyacrylamide gel electrophoresis (SDS-PAGE) was applied to  
234 evaluate the integrity of OVA in AS01<sub>B</sub>/OVA vaccines before and after they were subjected  
235 to thin-film freeze-drying, as well as before and after the vaccine powders were sprayed  
236 with an Aptar UDSP nasal device. Vaccine powders were reconstituted with water. To spray  
237 a powder, the powder was filled into a UDSP nasal device following the manufacturer’s  
238 instruction and sprayed into a glass pipette rubber head. The powder was then reconstituted  
239 from within the rubber head with water. For SDS-PAGE analysis, the sample was mixed  
240 with Laemmli sample buffer 4× containing 10% 2-mercaptoethanol, boiled for 10 min at

241 100°C, and then loaded into a well of a 4–20% precast polyacrylamide gel from Bio-Rad  
242 (Hercules, CA) (30 µL per well). The blue prestained protein standard was also loaded to  
243 the gel. The electrophoresis was performed at 90 V for 90 min. The SDS-PAGE gel was  
244 stained with Coomassie G-250, and the gel image was captured with a camera.

245

246 Scanning transmission electron microscope (STEM) was utilized to examine the integrity  
247 of the liposomes after the vaccine powder was sprayed with a UDSP nasal device. The  
248 vaccine powder was reconstituted and diluted 5 times with water and then transferred to a  
249 glow discharge-treated carbon coated copper grid from Electron Microscopy Sciences  
250 (Hatfield, PA). The sample was stained with a 2% uranyl acetate solution for 2 min and  
251 then air dried. Finally, the STEM images were captured with a Hitachi S5500 (Tokyo, Japan)  
252 available in the Texas Materials Institute at UT Austin.

253

## 254 ***2.7. In vitro mucoadhesion test***

255 The *in vitro* mucoadhesion test was done following a previously reported procedure with  
256 modifications (Trenkel and Scherließ, 2021). To simulate the human nasal mucosal tissue,  
257 10 cm Petri dishes were coated with two different solutions: 1.5% (w/v) agar in DPBS (pH  
258 = 6) or 1.5% (w/v) agar plus 2% (w/v) porcine mucin in DPBS (pH = 6). The coating layer  
259 was solidified by incubating the Petri dishes for 2 h at room temperature followed by 30  
260 min at 4°C. After solidification, the coated dishes were incubated at 32°C in a Fisher  
261 Scientific incubator-shaker (Hampton, NH) until equilibrium (shaking not applied), and 3-  
262 5 mg of the vaccine films were gently placed onto the gel. The dishes were then turned  
263 vertically and incubated for 2 h at 32°C. The maximum downward movement of the  
264 vaccine powders at the time points of 10 min, 20 min, 30 min, 1 h, and 2 h were recorded.

## 265 **2.8. Characterization of the TFF vaccine powders**

266 XRD was done using a Rigaku R-Axis Spider (Tokyo, Japan) available at UT Austin.  
267 Vaccine powder was mounted in mineral oil and loaded onto the sample loops. The powder  
268 was irradiated with Cu K $\alpha$  radiation, and the diffraction pattern was captured with a 2-D  
269 detector. The 2-D pattern was then converted to 1-D pattern. The crystal structures of the  
270 sodium chloride (NaCl) and sucrose were obtained from the Crystallography Open  
271 Database (COD) (<http://www.crystallography.net>), and the reference patterns were  
272 generated with a Cambridge Crystallographic Data Center (CCDC) Mercury software.  
273 Also, the crystallite sizes ( $\tau$ ) of the samples were calculated using the Scherrer equation:

$$274 \quad \tau = \frac{K \lambda}{\beta \cos \theta}$$

275 Where K is the shape factor 0.9,  $\lambda$  is the Cu K $\alpha$  radiation wavelength,  $\beta$  is the full width at  
276 half maximum (FWHM) of the peaks, and  $\theta$  is the Bragg angle.

277

278 To obtain the scanning electron microscope (SEM) images of a sample, a film of the TFF  
279 AS01<sub>B</sub>/OVA or the TFF AS01<sub>B</sub>/OVA with 1.9% CMC was placed onto the conductive  
280 carbon tape. The sample was then sputtered with a layer of Au/Pd (60:40) (40 mA, 1 min).  
281 SEM images were taken with a Hitachi S5500 with an acceleration voltage of 20 kV.

282

283 The surface profiles of the thin films were measured with Keyence VK-X1100 profilometer  
284 (Osaka, Japan) available at UT Austin. Before the measurement, a vaccine thin film was  
285 placed onto the unpolished side of the silicon wafer with the top up. The 3D reconstructed  
286 images of the film were captured with a 2.5  $\times$  objective lens while the ring light source was  
287 utilized. The thickness of the film was calculated with the Keyence Multi File Analyzer

288 software.

289

290 The residue water content in vaccine powder was determined by Karl Fischer titration using  
291 a Mettler Toledo C20 coulometer (Columbus, OH). Briefly, 2.5 mL of Coulomat AG  
292 solution was drawn from the solution tank and injected into the vial containing the powder  
293 with a gas-tight syringe. The solution was mixed well with the powder, and 2.0 mL of the  
294 mixture was then injected back to the solution tank. The amount of water in the samples  
295 was then determined by the instrument, and the water content (%) in the samples was  
296 calculated with the following equation:

297

$$298 \quad \text{Water content (\%)} = \frac{\text{Amount of water (mg)}}{\text{Solid content of the sample being injected (mg)}}$$

299

300 Temperature-modulated differential scanning calorimetry (mDSC) was performed using a  
301 TA Instruments Q20 differential scanning calorimeter (New Castle, DE) available at UT  
302 Austin. Briefly, 3-5 mg of the powder was loaded to the Tzero hermetic pan from TA  
303 Instruments. The scanning range was from -20 to 250°C. The temperature was modulated  
304  $\pm 1.0^\circ\text{C}$  every 60 s. The data were analyzed with the TA Instruments TRIOS software.

305

### 306 ***2.9. Plume geometry, spray pattern, and the particle size distribution of the aerosolized*** 307 ***powder***

308 The spray pattern and the plume geometry of the TFF vaccine powders were captured with  
309 an in-house built laser sheet system (Warnken et al., 2018). To study the plume geometry  
310 of a vaccine powder, the powder was loaded into a UDSP nasal device and sprayed upward.

311 Images were captured with a camera at a rate of 500 frames per second. To identify the  
312 boundary of the plume, the Fiji software (<https://imagej.net/software/fiji>) was used to  
313 create the z-stacking images from different time points to measure the plume angle. For the  
314 spray pattern, the vaccine powder was loaded into a UDSP nasal device and sprayed  
315 upward, and the laser sheet was located 6 cm above the tip. The images were captured at  
316 an angle of 45° and a frame rate of 500 frames per second. The Fiji software was then used  
317 to create the z-stacking images, and the perspective correction of the images was performed  
318 with MATLAB R2021b software. The ovality and the area were then measured with the  
319 Fiji software.

320

321 To measure the particle size distribution of the sprayed vaccine powder, the powder was  
322 filled into a UDSP nasal device and sprayed to measure the particle size with Malvern  
323 Spraytec. During the experiment, the device was fixed with a clamp, and the angle was  
324 adjusted to 30° above to the horizontal plane. The distance between the tip and the laser  
325 spot was 6 cm, while the device to lens distance was 9 cm. The device was actuated  
326 manually, and the laser diffraction signal was recorded at a frame rate of 2500 Hz.

327

328 SEM was also utilized to examine the particles after the vaccine powder was sprayed with  
329 a UDSP nasal device. The SEM specimen mount was first covered with a non-porous  
330 carbon tape. The vaccine powder was then sprayed onto the carbon tape at a distance of 6  
331 cm. The sample was then sputtered with Au/Pd (60:40) (40 mA, 1 min), and the images  
332 were captured with an acceleration voltage of 20 kV.

333

334 **2.10. Deposition pattern of the TFF vaccine powder**

335 For this experiment, FITC-labeled OVA (i.e., OVA-FITC) was used to prepare the  
336 AS01<sub>B</sub>/OVA-FITC vaccine with 1.9% CMC. The detailed preparation procedure of the  
337 OVA-FITC is in Supplementary Material S1.

338

339 The two 3D-printed nasal casts based on the CT-scan images of a male of 48 years of age  
340 and a female of 7 years of age were used to perform the deposition test (Warnken et al.,  
341 2018). The inner surface of the nasal cast was coated with an artificial nasal mucus, and  
342 the excess fluid was purged with air. The TFF AS01<sub>B</sub>/OVA/CMC<sub>1.9%</sub> vaccine powder (OVA  
343 labeled with FITC) was loaded into a UDSP nasal device and sprayed into the left nostril  
344 of the nasal cast. The coronal angle and sagittal angle were 0° or 20° and 45° or 60°,  
345 respectively. The definitions of the coronal angle and the sagittal angle are shown in **Fig.**  
346 **sup1**. The insertion depth was 0.5 cm for the 48-year-old male nasal cast and 0.4 cm for  
347 the 7-year-old female nasal cast. To determine the effect of breathing on the deposition  
348 pattern, the nasal cast was connected to a vacuum pump to evaluate the effect of flow rate  
349 on the deposition pattern. The flow rate was set at 0 or 10 liter per min (LPM) for the 48-  
350 year-old male nasal cast and 0 or 5 LPM for the 7-year-old nasal cast. For three parameters  
351 (i.e., coronal angle, sagittal angle, and flow rate), each with 2 levels, the Taguchi L8  
352 orthogonal array (**Table 1**) was used to find their optimal combination.

353

354 After the powder was aerosolized, the nasal cast was disassembled into the following parts:  
355 (1) vestibule, (2) upper turbinate, (3) middle turbinate, (4) lower turbinate, (5) nasopharynx,  
356 and (6) filter. Each part was rinsed with 5 mL of water. The fluorescence intensities of the  
357 solutions were measured with a BioTek Microplate Reader (Winooski, VT). The amount  
358 of powder deposited in each part was calculated based on a calibration curve constructed

359 with FITC-labeled vaccine powder dissolved in water.

360

361 The delivery efficiency of the powder using the UDSP nasal device was calculated based  
362 on the following equation:

$$363 \quad \text{Delivery efficiency (\%)} = \frac{\text{Amount of the powder delivered (mg)}}{\text{Amount of the powder loaded in the UDSP (mg)}} \times 100\%$$

364

365 The recovery percentage of the vaccine powder in the nasal cast was defined as:

$$366 \quad \text{Recovery percentage (\%)} = \frac{\text{Total amount of the powder recovered (mg)}}{\text{Amount of the powder delivered (mg)}}$$

367 Where the total amount of the powder recovered was based on the fluorescence intensity  
368 measurement.

369

370 The deposition efficiency of the vaccine powder in a specific part or region of the nasal  
371 cast was defined as:

$$372 \quad \text{Deposition efficiency (\%)} = \frac{\text{Amount of the powder recovered in each part (mg)}}{\text{Amount of the powder recovered (mg)}} \times 100\%$$

373

374 Finally, the total amount of the powder recovered in the desirable region (i.e., middle  
375 turbinate, lower turbinate, and nasopharynx region) was defined as the regional deposition  
376 efficiency (RDP).

377

378 To identify the optimized conditions for the RDP, the signal to noise (S/N) ratio was  
379 calculated for each parameter at different levels based on the “larger the better”  
380 characteristic of the Taguchi method (Ghani et al., 2004).



381 
$$\text{S/N ratio} = -10 \times \log\left(\frac{1}{n} \sum_{i=1}^n \left(\frac{1}{y_i^2}\right)\right)$$

382 Where n is the number of observations for each parameter, and y is the average of the  
383 observation (i.e., RPD).

384

385 **Table 1.** The Taguchi L8 orthogonal array for studying the deposition patterns of the TFF  
386 vaccine powder in two different nasal casts

| Run # | Coronal Angle | Sagittal Angle | Flow Rate (LPM) |            |
|-------|---------------|----------------|-----------------|------------|
|       |               |                | 48-year-old     | 7-year-old |
| 1     | 0°            | 45°            | 0               | 0          |
| 2     | 20°           | 60°            | 0               | 0          |
| 3     | 20°           | 45°            | 10              | 5          |
| 4     | 0°            | 60°            | 10              | 5          |

387

## 388 2.11 Statistical analysis

389 Statistical analysis was performed with Microsoft Office Excel or OriginLab OriginPro  
390 2022b. Data are presented as mean  $\pm$  standard deviation (SD), and the number of the  
391 replication (n) was indicated in the figure caption.

392

393

394

395

### 396 3. Results and Discussions

397

#### 398 3.1. Preparation and thin-film freeze-drying of the AS01<sub>B</sub>/OVA model vaccine

399 AS01<sub>B</sub> is a liposomal adjuvant comprised of DOPC, cholesterol, MPL, and QS21. AS01<sub>B</sub>  
400 is prepared by adding QS21 in preprepared liposomes comprised of DOPC, cholesterol,  
401 and MPL (1:0.25:0.05, w/w) (AboulFotouh et al., 2022b). The DOPC/cholesterol/MPL  
402 liposomes prepared had a hydrodynamic diameter of  $101.3 \pm 5.3$  nm ( $n = 7$ ). The  
403 AS01<sub>B</sub>/OVA vaccine was then prepared by mixing the liposome suspension with a solution  
404 of OVA and a solution of QS21. Data from a previous study from our group showed that  
405 sucrose at a sucrose to lipid ratio of 15:1 (w/w) protected the AS01<sub>B</sub>/OVA vaccine during  
406 thin-film freeze-drying (AboulFotouh et al., 2022b). **Fig. 1** shows the particle size  
407 distribution curves of the AS01<sub>B</sub>/OVA vaccine before and after it was subjected to thin-  
408 film freeze-drying and reconstitution. As expected, there was not any significant change in  
409 the particle size distribution after the vaccine was subjected to thin-film freeze-drying.

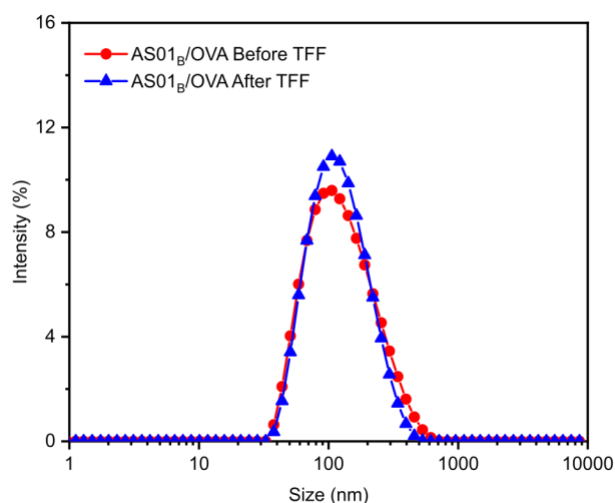

410

411 **Fig. 1.** Representative particle size distribution curves of the AS01<sub>B</sub>/OVA vaccine before

412 and after it was subjected to thin-film freeze-drying and reconstitution.

### 413 **3.2. Identification of an AS01<sub>B</sub>/OVA vaccine formulation with a mucoadhesive agent**

414 A mucosal adhesive agent is needed in the AS01<sub>B</sub>/OVA vaccine to increase its residence  
415 time in the nasal cavity. Chitosan, sodium alginate, gelatin, or CMC was added into the  
416 AS01<sub>B</sub>/OVA vaccine as a mucoadhesive agent to reach a final concentration of 0, 1.9%,  
417 3.7, 7.2, or 16.3% by weight (vs. total weight of the vaccine except water), and the particle  
418 size and zeta potential values of the formulations before and after they were subjected to  
419 thin-film freeze-drying and reconstitution were determined. As shown in **Fig. sup2A**,  
420 adding sodium alginate, gelatin, and CMC at 7.2% (w/w) or below did not affect the  
421 particle size of AS01<sub>B</sub>/OVA vaccine, while chitosan at all concentrations tested caused a  
422 significant increase in the particle size, which might be due to the relatively small zeta  
423 potential value of the AS01<sub>B</sub>/OVA with chitosan (**Fig. sup2B**). After thin-film freeze-  
424 drying and reconstitution, only the AS01<sub>B</sub>/OVA vaccine formulations with gelatin or CMC  
425 at the concentrations of 1.9% or 3.7% by weight maintained their particle size (**Fig. sup2C**).  
426 Overall, adding the mucoadhesive agents changed the zeta potential value of the  
427 AS01<sub>B</sub>/OVA vaccine (**Fig. sup2B, D**), which was not surprising as all mucoadhesive agents  
428 tested were expected to have a certain extent of ionization at pH 7.2 to 7.4. However,  
429 subjecting the AS01<sub>B</sub>/OVA vaccine formulations to thin-film freeze-drying did not  
430 significantly affect their zeta potential values (**Fig. sup2B, D**). Shown in **Fig. 2A, B, C** are  
431 the particle sizes, particle size distribution curves, and zeta potential values of the  
432 AS01<sub>B</sub>/OVA vaccine formulations with CMC at 1.9%, 3.7%, 7.2%, or 16.3%, w/w, before  
433 and after they subjected to thin-film freeze-drying and reconstitution. Clearly, the particle  
434 size distribution profiles in the vaccine formulations containing 1.9% or 3.7% (w/w) of  
435 CMC were preserved after they were subjected to thin-film freeze-drying. The zeta  
436 potential values of the AS01<sub>B</sub>/OVA vaccines with CMC did not significantly change after

437 they were subjected to thin-film freeze-drying (**Fig. 2C**), although it is unclear why the  
438 zeta potential value of the AS01<sub>B</sub>/OVA vaccine without CMC became more negative (**Fig.**  
439 **2C**). Therefore, the AS01<sub>B</sub>/OVA vaccine formulations with CMC at 1.9% or 3.7% (w/w)  
440 were chosen for further study.  
441

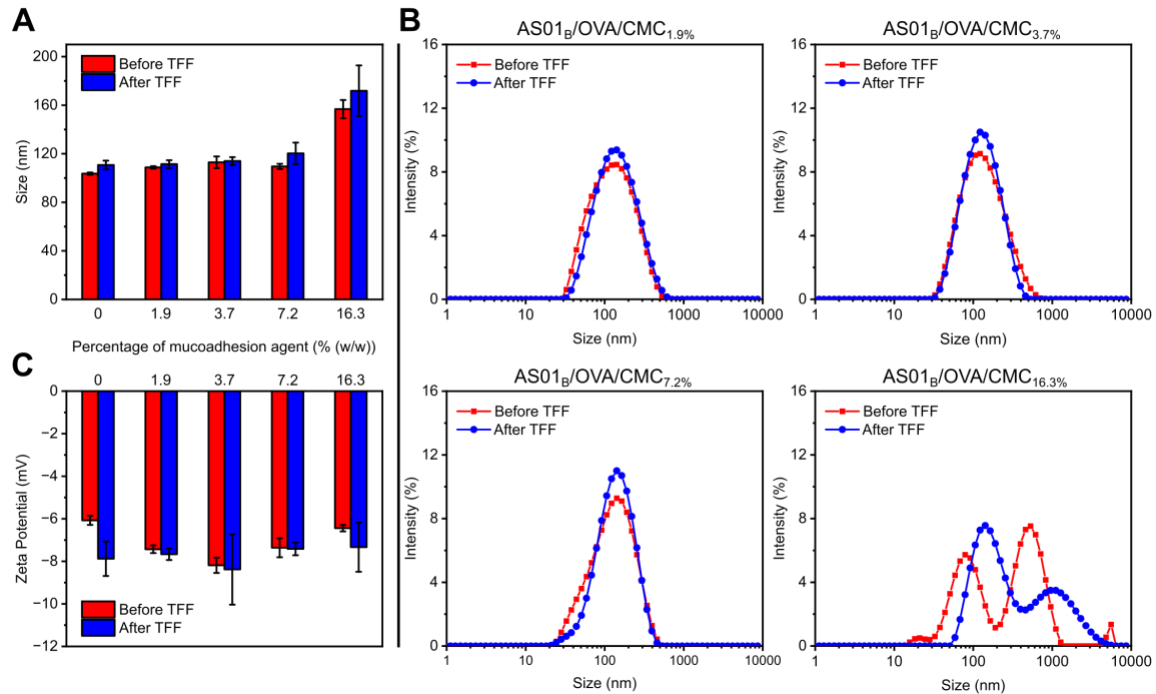

442  
443 **Fig. 2.** AS01<sub>B</sub>/OVA with different concentrations of CMC as a mucoadhesive agent.  
444 Shown are (A) particle size, (B) representative particle size distribution curve, and (C)  
445 zeta potential. Data in A and C are mean ± S.D. (n = 3).  
446

### 447 3.3. The integrity of the OVA before and after the AS01<sub>B</sub>/OVA vaccine formulations with 448 CMC were subjected to thin-film freeze-drying

449 To evaluate the impact of the thin-film freeze-drying process on the integrity of OVA  
450 antigen, SDS-PAGE was used to analyze the AS01<sub>B</sub>/OVA vaccine formulations containing  
451 0, 1.9%, or 3.7% of CMC. The original OVA in solution (**Fig. 3**, lane I) showed two bands

452 around 43 kDa, which might be attributed to the different glycosylated forms of OVA. A  
453 close comparison of **Fig. 3** lanes II vs. III, lanes IV vs. V, and lanes VI vs. VII did not show  
454 any apparent difference, indicating that the integrity of OVA was maintained, regardless of  
455 the content of the CMC in the vaccine formulations. SDS-PAGE analysis with the  
456 individual component of the AS01<sub>B</sub>/OVA vaccine formulations confirmed that the broad  
457 bands below 11 kDa shown in the AS01<sub>B</sub>/OVA samples (**Fig. 3**) were from the liposomes  
458 (**Fig. sup3**).

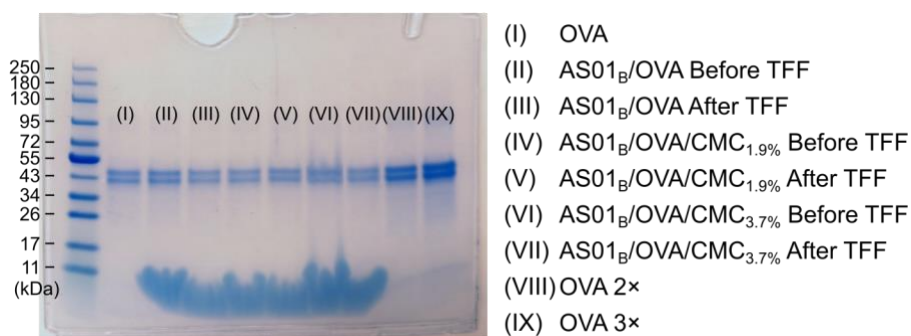

459

460 **Fig. 3.** SDS-PAGE image of AS01<sub>B</sub>/OVA with 0, 1.9%, or 3.7% of CMC before and after  
461 they were subjected to thin-film freeze-drying and reconstitution.

462

### 463 **3.4. *In vitro* mucoadhesion test**

464 Petri dishes coated with 1.5% agar or 1.5% agar plus 2% porcine mucin were used to  
465 simulate the surface of human mucosal tissue. In the *in vitro* mucoadhesion test, films of  
466 TFF AS01<sub>B</sub>/OVA powders with 0, 1.9%, or 3.7% of CMC were placed on the agar or agar  
467 plus porcine mucin layer. The dishes were turned vertically and incubated at 32°C (**Fig.**  
468 **4A**). The thin films swelled due to the moisture in the gel or the atmosphere and flowed  
469 down slowly. The maximum traveling distances of the formulations at different time points  
470 are shown in **Fig. 4B**.

471

472 With the gel containing 1.5% agar only, the displacement of the TFF AS01<sub>B</sub>/OVA powder  
473 almost reached 6 cm after 10 min of incubations, while the displacements of TFF  
474 AS01<sub>B</sub>/OVA vaccine powders with 1.9% or 3.7% CMC were only 1.5 cm and 2 cm,  
475 respectively, during the same time period. The displacement of the TFF AS01<sub>B</sub>/OVA  
476 vaccine powders with 1.9% and 3.7% CMC both reached ~4.5 cm after 1 h of incubation,  
477 indicating that the CMC in the AS01<sub>B</sub>/OVA vaccine rendered the vaccine powders adhesive  
478 to agar gel.

479

480 With the gel containing 1.5% agar and 2% porcine mucin, the displacements of all three  
481 TFF vaccine powders decreased significantly. However, the displacement of the TFF  
482 AS01<sub>B</sub>/OVA powder without CMC was still larger than that of TFF AS01<sub>B</sub>/OVA powders  
483 with 1.9% or 3.7% CMC (**Fig. 4B**). The displacement of the TFF AS01<sub>B</sub>/OVA powder with  
484 1.9% CMC was slightly smaller than that with 3.7% CMC. Therefore, the TFF AS01<sub>B</sub>/OVA  
485 vaccine with 1.9% CMC (AS01<sub>B</sub>/OVA/CMC<sub>1.9%</sub>) was selected for further study.

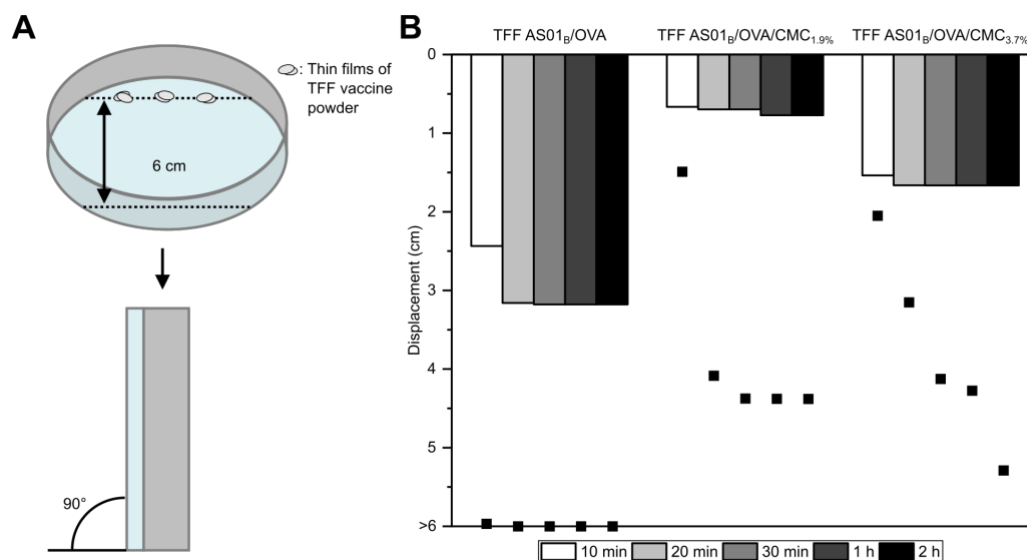

486

487 **Fig. 4.** In vitro mucoadhesion test. (A) Experimental design. (B) Displacement of TFF  
488 AS01<sub>B</sub>/OVA vaccine powders with or without 1.9% or 3.7% CMC on 1.5% agar gel  
489 (dots) or 1.5% agar plus 2% porcine mucin gel (bars).

490

### 491 **3.5. Characterization of the TFF AS01<sub>B</sub>/OVA vaccine powders with 0 or 1.9% CMC**

492 The residue water content in the TFF vaccine powders is important to their stability and  
493 aerosol properties. The moisture contents in the TFF AS01<sub>B</sub>/OVA powder and the TFF  
494 AS01<sub>B</sub>/OVA/CMC<sub>1.9%</sub> powder were  $3.29 \pm 0.21\%$  and  $1.78 \pm 0.14\%$ , respectively. The  
495 CMC in the TFF AS01<sub>B</sub>/OVA/CMC<sub>1.9%</sub> sample likely made the sucrose matrix less  
496 hygroscopic.

497

498 Surface profilometer was used to characterize the surface of the TFF vaccine powders. **Fig.**  
499 **5A and 5B** show the images of the thin films of TFF AS01<sub>B</sub>/OVA powders with 0 or 1.9%  
500 of CMC. It appears that the TFF AS01<sub>B</sub>/OVA film was more porous compared to the TFF  
501 AS01<sub>B</sub>/OVA/CMC<sub>1.9%</sub> film. In addition, the TFF AS01<sub>B</sub>/OVA/CMC<sub>1.9%</sub> film had a radial  
502 pattern, which was likely because the nucleation process of the sucrose was altered by the  
503 CMC during the TFF process. The mean thickness of the TFF films was determined using  
504 six randomly selected films of the TFF AS01<sub>B</sub>/OVA vaccine powders with 0 or 1.9% CMC.  
505 The mean thickness of the TFF AS01<sub>B</sub>/OVA/CMC<sub>1.9%</sub> films was  $228.7 \pm 51.1 \mu\text{m}$ , about  
506 37% larger than that of the TFF AS01<sub>B</sub>/OVA films (i.e.,  $167.3 \pm 44.4 \mu\text{m}$ ). Considering  
507 that the distance between the needle tip and the cryogenically cooled surface was fixed, it  
508 is likely that the CMC in the AS01<sub>B</sub>/OVA vaccine made the vaccine droplets difficult to  
509 completely spread upon impact on the cooled surface during the TFF process. It is also

510 possible that for the AS01<sub>B</sub>/OVA vaccine, without CMC, the sucrose was less prone to  
511 collapse during the drying process.

512

513 The microscopic structures of the TFF vaccine powders were examined using SEM. The  
514 SEM images (**Fig. 5C-F**) (both top view and bottom view) revealed that the TFF  
515 AS01<sub>B</sub>/OVA and AS01<sub>B</sub>/OVA/CMC<sub>1.9%</sub> films were porous. However, the TFF  
516 AS01<sub>B</sub>/OVA/CMC<sub>1.9%</sub> sample looked more fibrous than the TFF AS01<sub>B</sub>/OVA sample (**Fig.**  
517 **5C-D**), likely due to the presence of the CMC in the formulation. Moreover, minor phase  
518 separation was observed in both samples. The small particles deposited on the sucrose  
519 matrix were likely crystals of the buffer salts.

520

521 One important factor affecting the integrity of the vaccine formulation during the freezing  
522 and subsequent sublimation process was the crystallization of the excipients. XRD was  
523 used to characterize the crystalline properties of TFF powders (**Fig. 6A**). The peaks at 27.5°,  
524 31.8°, 45.6°, 56.7°, 66.5°, and 75.6° on the patterns of TFF AS01<sub>B</sub>/OVA and TFF  
525 AS01<sub>B</sub>/OVA/CMC<sub>1.9%</sub> powders were identified as the (111), (200), (220), (222), (400), and  
526 (420) planes of NaCl according to its simulated pattern. The crystallite sizes of the NaCl  
527 in TFF AS01<sub>B</sub>/OVA and AS01<sub>B</sub>/OVA/CMC<sub>1.9%</sub> powders were 23.0 nm and 22.5 nm,  
528 respectively, as calculated using the Scherrer equation. Peaks unique to sucrose were not  
529 present, indicating that sucrose remained amorphous in the TFF vaccine powders, which is  
530 in agreement with previous findings with other sucrose-containing TFF powders  
531 (AboulFotouh et al., 2022b; Zhang et al., 2021), and is desirable for maintaining the  
532 integrity of the vaccine during TFF process.

533



534 **Fig. 6B** shows the DSC profiles of the TFF AS01<sub>B</sub>/OVA and AS01<sub>B</sub>/OVA/CMC<sub>1.9%</sub>  
535 samples. Their glass transition temperatures ( $T_g$ ) were 6.87°C and 32.66°C, respectively.  
536 Because it was reported that freeze-dried samples would crystallize and collapse when  
537 being stored at a temperature above their  $T_g$  (te Booy et al., 1992), it was concluded that  
538 the TFF AS01<sub>B</sub>/OVA/CMC<sub>1.9%</sub> powder could provide better stability while stored at a  
539 temperature equal to or below room temperatures. Of course, different sugars and polymers  
540 may be included in the powders to further increase their  $T_g$ , and thus thermostability, if  
541 needed. The DSC profiles of TFF AS01<sub>B</sub>/OVA and AS01<sub>B</sub>/OVA/CMC<sub>1.9%</sub> powders both  
542 showed a major endotherm peak around 189°C, which is likely due to the melting of  
543 sucrose (Beckett et al., 2006). The mechanism underlying the smaller peak located left of  
544 the main melting endotherm of sucrose in both TFF AS01<sub>B</sub>/OVA and AS01<sub>B</sub>/OVA/CMC<sub>1.9%</sub>  
545 powders is unknown. However, considering that there were several components in the TFF  
546 powders and sucrose is prone to decomposition during the melting process (Lu et al., 2017),  
547 the melting endotherm of sucrose could be distorted (Bhandari and Hartel, 2002).  
548

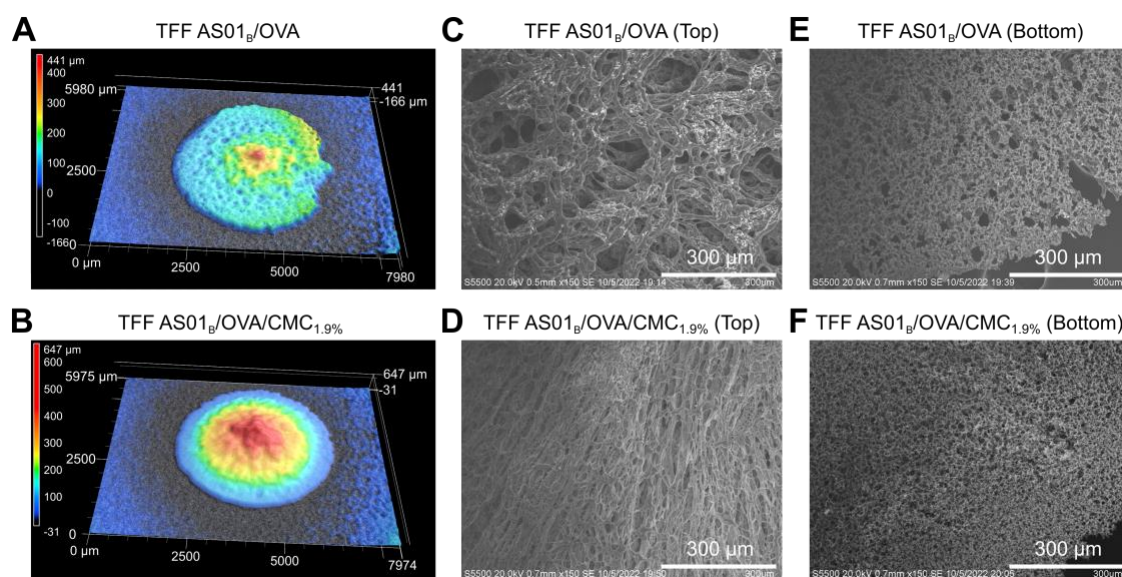

549

550 **Fig. 5.** Characterization of TFF AS01<sub>B</sub>/OVA and AS01<sub>B</sub>/OVA/CMC<sub>1.9%</sub> films. Shown in  
551 A-B are representative surface profiles of the TFF AS01<sub>B</sub>/OVA (A) and TFF  
552 AS01<sub>B</sub>/OVA/CMC<sub>1.9%</sub> films (B). (C-D) Representative SEM images (top view) of the  
553 TFF AS01<sub>B</sub>/OVA (C) and AS01<sub>B</sub>/OVA/CMC<sub>1.9%</sub> films (D). (E-F) Representative SEM  
554 images (bottom view) of the TFF AS01<sub>B</sub>/OVA (E) and AS01<sub>B</sub>/OVA/CMC<sub>1.9%</sub> films (F).  
555

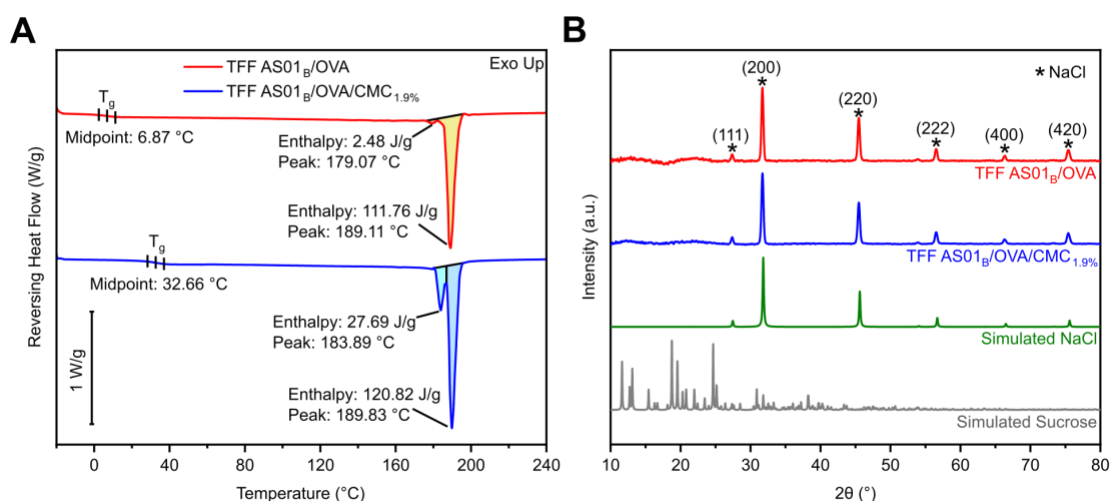

556 **Fig. 6.** (A) The XRD diffractograms of the TFF vaccine powders and the simulated  
557 patterns of NaCl (COD: 1000041) and sucrose (COD: 3500015). (B) The DSC profiles of  
558 the TFF vaccine powders.  
559

560

### 561 **3.6. Spraytec analysis of the thin-film freeze-dried AS01<sub>B</sub>/OVA vaccine powders sprayed** 562 **with a UDSP nasal device**

563 The AS01<sub>B</sub>/OVA vaccine powder was filled into the UDSP nasal device manually (~19 mg  
564 per device) and sprayed to characterize the particle size distribution using laser diffraction.  
565 The existing FDA's draft guidelines for size distribution characterization by laser  
566 diffraction only cover sprayed liquid formulations. The spray is divided into the initial

567 phase, the fully developed phase, and the dissipation phase. According to the transmission  
568 profile shown in **Fig. 7A**, the TFF AS01<sub>B</sub>/OVA vaccine powder sprayed with the UDSP  
569 nasal device did not have an obvious fully developed (or stable) phase. Instead, the  
570 transmission reached a minimum around 3 milliseconds (ms) after the actuation and then  
571 rapidly recovered to the maximum within 14 ms; this result matched the time-course  
572 images of the sprayed powder captured by a high-speed camera (**Fig. 7B**). Therefore, the  
573 particle size at 4 ms centered around the minimum transmission was integrated, which was  
574 more representative compared to that in the recommended fully developed phase.

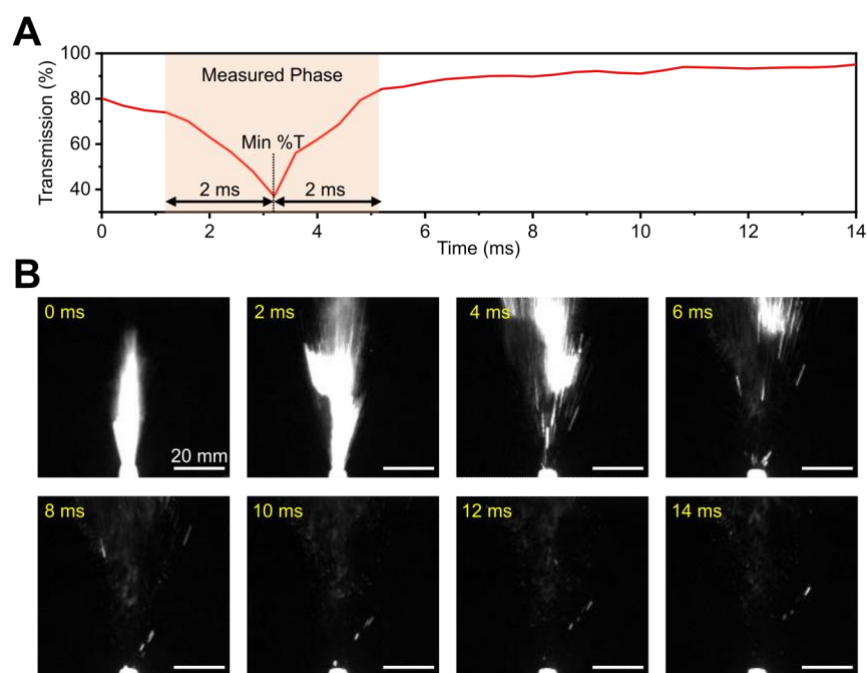

575  
576 **Fig. 7.** (A) A representative transmission profile of the TFF AS01<sub>B</sub>/OVA vaccine powder  
577 and (B) the time course images of the TFF AS01<sub>B</sub>/OVA powder sprayed with the UDSP  
578 nasal device.

579

580 **Figs. 8A and B** show the particle size distribution of the TFF AS01<sub>B</sub>/OVA and the TFF  
581 AS01<sub>B</sub>/OVA/CMC<sub>1.9%</sub> powders, which had a median particle size by volume (D<sub>v</sub>(50))

582 value of  $311.9 \pm 1.3 \mu\text{m}$  and  $224.2 \pm 12.0 \mu\text{m}$ , respectively. The  $\%V < 10 \mu\text{m}$  values for  
583 the TFF AS01<sub>B</sub>/OVA powder and the AS01<sub>B</sub>/OVA/CMC<sub>1.9%</sub> powder were  $0.66 \pm 0.09 \%$   
584 and  $0.51 \pm 0.09 \%$ , respectively (**Fig. 8A, B**).

585

586 SEM was used to examine the sprayed powders of the TFF AS01<sub>B</sub>/OVA and the  
587 AS01<sub>B</sub>/OVA/CMC<sub>1.9%</sub> vaccines (**Fig. 8C, D**). The particles of sprayed powders were not  
588 uniform, showing a wide size distribution, and the particles of the sprayed TFF  
589 AS01<sub>B</sub>/OVA/CMC<sub>1.9%</sub> powder were generally smaller than that of sprayed TFF  
590 AS01<sub>B</sub>/OVA powder, which agreed with the Spraytec results (**Fig. 8A, B**). Although there  
591 were small particles in the background of sprayed TFF AS01<sub>B</sub>/OVA powder and  
592 AS01<sub>B</sub>/OVA/CMC<sub>1.9%</sub> powder (**Fig. 8C, D**), the contribution of those particles to the  
593 volume frequency was insignificant compared to large particles, which agrees with the  
594 unimodal distribution of the particle size based on the Spraytec result (**Fig. 8A, B**). Also,  
595 since most of the small particles were larger than  $10 \mu\text{m}$ , the risk of the particles entering  
596 the lung after intranasal administration in humans is minimized, indicating that it is suitable  
597 to use the UDSP nasal device for intranasal administration of the TFF vaccine powders.

598

### 599 ***3.7. The plume geometry and spray pattern of the thin-film freeze-dried AS01<sub>B</sub>/OVA*** 600 ***vaccine powders sprayed with the UDSP nasal device***

601 The plume geometry and the spray pattern of the TFF AS01<sub>B</sub>/OVA vaccine powder were  
602 studied after the powder was sprayed using a UDSP nasal device and shown in **Fig 9**. The  
603 plume angles of the TFF AS01<sub>B</sub>/OVA powder and the TFF AS01<sub>B</sub>/OVA/CMC<sub>1.9%</sub> powder  
604 were  $24.90 \pm 4.05^\circ$  and  $24.52 \pm 4.81^\circ$ , respectively. Statistical analysis of the spray pattern  
605 shows that the area of the pattern was  $367.70 \pm 48.96 \text{ mm}^2$  for the TFF AS01<sub>B</sub>/OVA powder

606 and  $361.70 \pm 55.83 \text{ mm}^2$  for the TFF AS01<sub>B</sub>/OVA/CMC<sub>1.9%</sub> powder. Both powders had  
607 good ovality values, i.e.,  $1.28 \pm 0.11$  for the TFF AS01<sub>B</sub>/OVA powder and  $1.22 \pm 0.08$  for  
608 the TFF AS01<sub>B</sub>/OVA/CMC<sub>1.9%</sub> powder. Overall, it was concluded that including the CMC  
609 at 1.9% w/w in the AS01<sub>B</sub>/OVA vaccine did not significantly affect the spray pattern and  
610 plume geometry of the powder after spraying using the UDSP nasal device.  
611

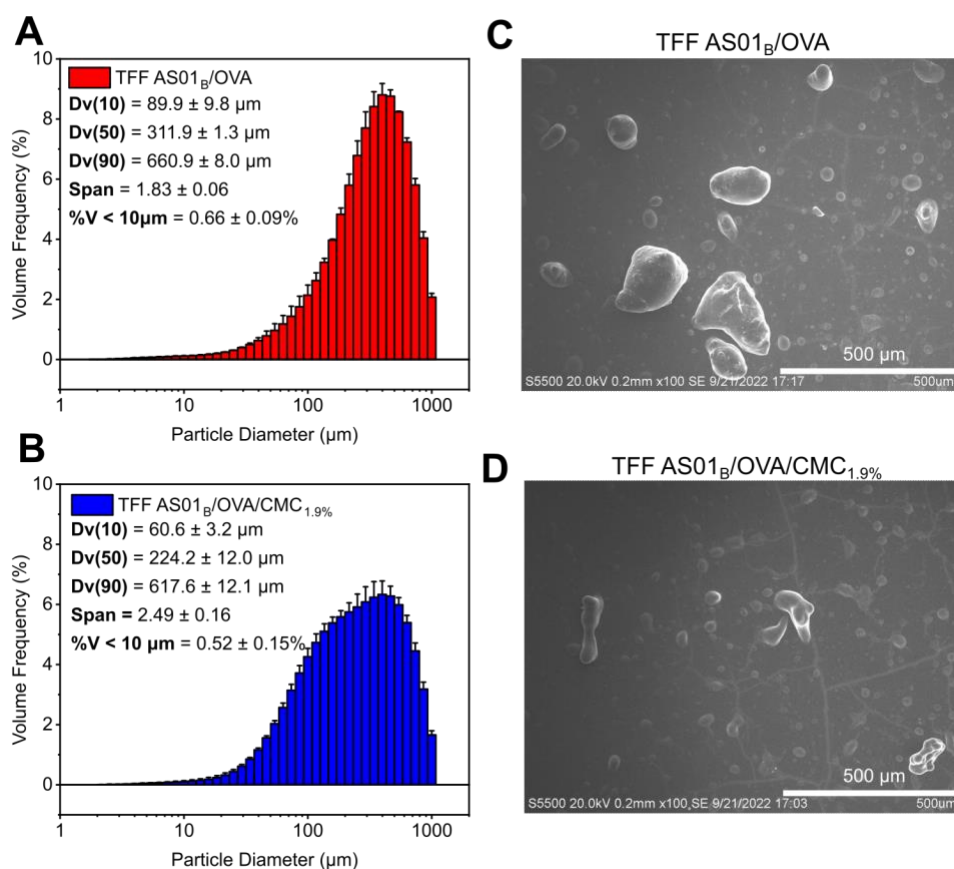

612  
613 **Fig. 8.** (A-B) The particle size distribution curves of (A) TFF AS01<sub>B</sub>/OVA and (B) TFF  
614 AS01<sub>B</sub>/OVA/CMC<sub>1.9%</sub> powders sprayed using a UDSP nasal device and determined using  
615 a Spraytec spray particle size analyzer. (C-D) Representative SEM images of TFF  
616 AS01<sub>B</sub>/OVA powder and TFF AS01<sub>B</sub>/OVA/CMC<sub>1.9%</sub> powder after they were sprayed  
617 using a UDSP nasal device.

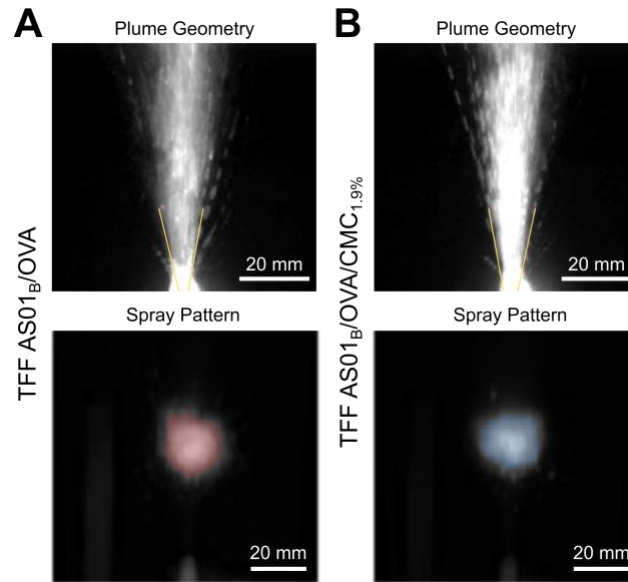

618

619 **Fig. 9.** The plume geometries and spray patterns of the TFF AS01<sub>B</sub>/OVA and the TFF  
620 AS01<sub>B</sub>/OVA/CMC<sub>1.9%</sub> powders after they were sprayed using a UDSP nasal device.

621

622 **3.8. The integrity of the OVA and the AS01<sub>B</sub> after the AS01<sub>B</sub>/OVA vaccine powders were**  
623 **sprayed using the UDSP nasal device**

624 The integrity of the OVA after the TFF AS01<sub>B</sub>/OVA powder was aerosolized using the  
625 UDSP nasal device was evaluated using SDS-PAGE. As shown in **Fig. 10A**, a comparison  
626 of the OVA bands in lanes II vs. III and lanes IV vs. V did not reveal fragmentation or  
627 aggregation of the OVA protein in the TFF AS01<sub>B</sub>/OVA powder and the TFF  
628 AS01<sub>B</sub>/OVA/CMC<sub>1.9%</sub> powder. Clearly, the OVA protein in the AS01<sub>B</sub>/OVA vaccine  
629 powders was not sensitive to the shear stress associated with spraying them with the UDSP  
630 nasal device.

631

632 STEM was also used to characterize the TFF AS01<sub>B</sub>/OVA/CMC<sub>1.9%</sub> powder before and  
633 after it was sprayed with the UDSP nasal device (**Fig. 10B, C**). The liposomes in the TFF



634 AS01<sub>B</sub>/OVA/CMC<sub>1.9%</sub> powder before and after being sprayed with the UDSP nasal device  
635 were about 100 nm. Also, no obvious liposome aggregation was observed after the TFF  
636 AS01<sub>B</sub>/OVA/CMC<sub>1.9%</sub> powder was sprayed, indicating that the liposomes in the TFF  
637 AS01<sub>B</sub>/OVA/CMC<sub>1.9%</sub> vaccine powders were also not sensitive to the shear stress  
638 associated with spraying them with the UDSP nasal device.  
639

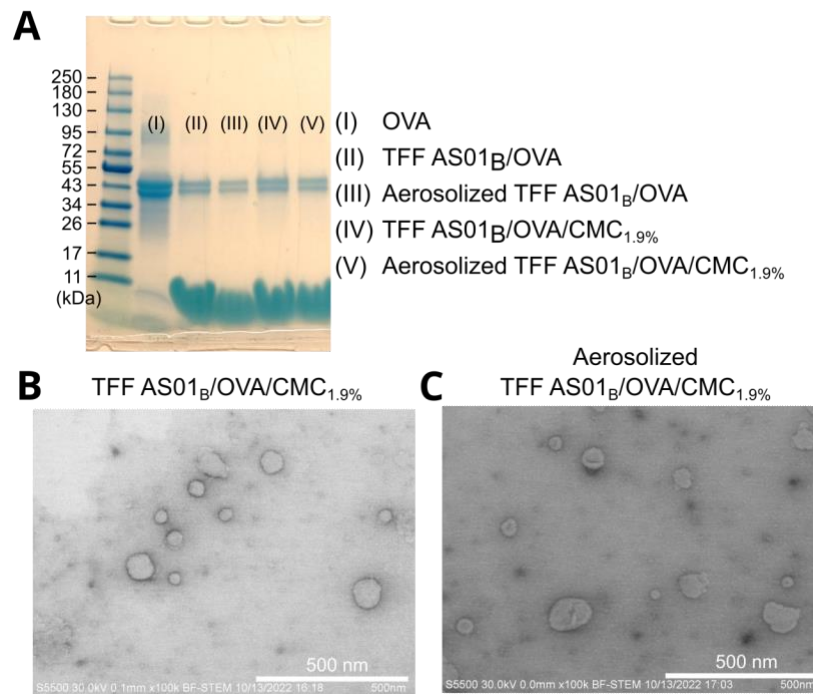

640  
641 **Fig. 10.** The integrity of the AS01<sub>B</sub>/OVA vaccine powder before and after being sprayed  
642 with the UDSP nasal device. (A) The SDS-PAGE image of the TFF AS01<sub>B</sub>/OVA and the  
643 AS01<sub>B</sub>/OVA/CMC<sub>1.9%</sub> before and after they were sprayed. (B) Representative STEM  
644 images of TFF AS01<sub>B</sub>/OVA/CMC<sub>1.9%</sub> powder before and after it was sprayed using a  
645 UDSP device.

646

647 **3.9. Deposition patterns of the TFF AS01<sub>B</sub>/OVA/CMC<sub>1.9%</sub> vaccine powder in nasal**  
648 **casts**

649 The TFF AS01<sub>B</sub>/OVA/CMC<sub>1.9%</sub> powder was manually loaded into the UDSP nasal device  
650 at  $22.99 \pm 1.58$  mg ( $n = 27$ ). After actuation, the delivered amount of the TFF  
651 AS01<sub>B</sub>/OVA/CMC<sub>1.9%</sub> powder was  $21.69 \pm 1.60$  mg. In other words, the delivery  
652 efficiency was  $94.46 \pm 4.87\%$ .

653

654 The deposition pattern of the TFF AS01<sub>B</sub>/OVA/CMC<sub>1.9%</sub> in the nasal cast based on the CT  
655 scan of a 48-year-old male is shown in **Fig. 11A-B**. In all the conditions, the majority of  
656 the TFF powder was deposited in the middle and lower turbinate and the nasopharynx  
657 regions. When an air flow of 10 LPM was applied to the nasal cast, the deposition  
658 percentage in the nasopharynx region and the filter increased, which is expected. The  
659 percentage deposited in the upper turbinate region where the olfactory bulb resides was  
660 less than 10% in all the conditions, indicating that the exposure of the vaccine powder to  
661 the olfactory bulb can be minimized by spraying the TFF vaccine powder with the UDSP  
662 nasal device. As shown in **Fig. 11C**, the RDP of Run #1 had the highest value of 84.4%,  
663 and the Run #2 showed the lowest value of 71.3%. To evaluate the effect of each parameter  
664 on the RDP, the S/N ratios were calculated. Since a higher S/N ratio will lead to a higher  
665 RDP, it was concluded that the optimal condition for the RDP in the nasal cast based on a  
666 48-year-old male is: 0° for the coronal angle, 45° for the sagittal angle, and 0 LPM for the  
667 flow rate, which is the same as Run #1 (**Fig. 11D**). Finally, since the difference of the S/N  
668 ratio between two levels indicates the impact of the parameter on the RDP, it was concluded  
669 that the order of the impact on RDP was sagittal angle > coronal angle > flow rate.

670



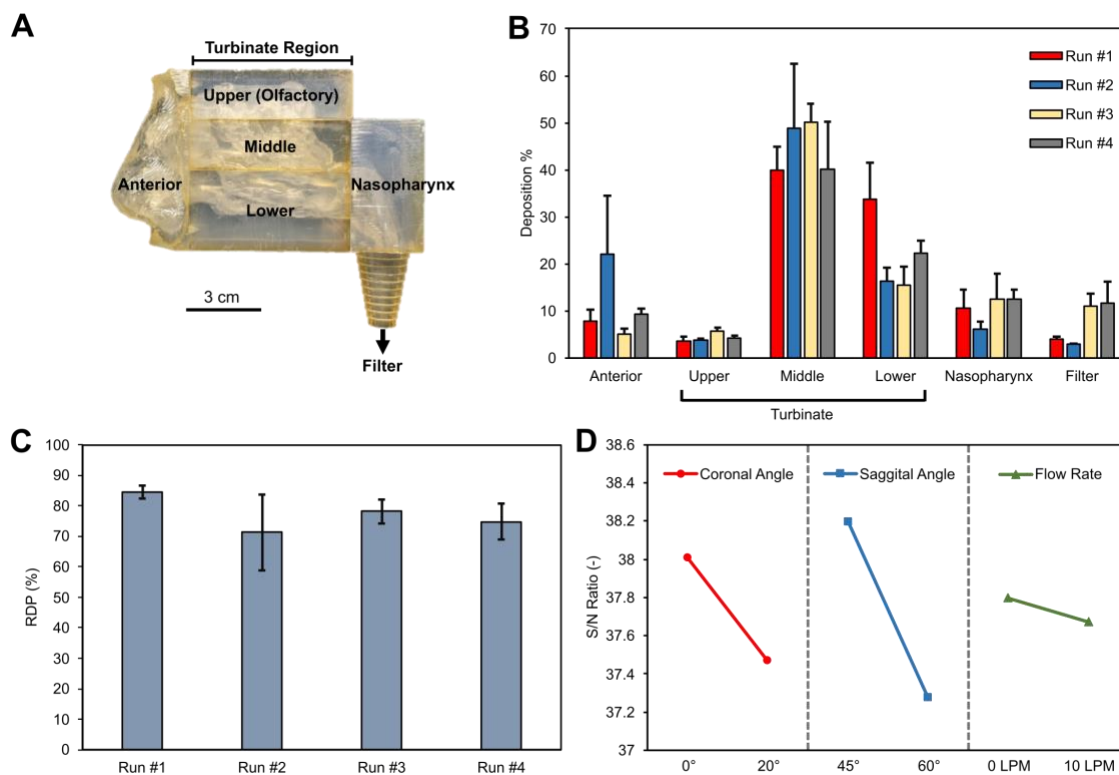

671

672 **Fig. 11.** Deposition patterns of TFF AS01<sub>B</sub>/OVA/CMC<sub>1.9%</sub> vaccine powder in a nasal cast  
 673 based on a 48-year-old male. (A) A digital image of the nasal cast with different regions  
 674 labeled. (B) The deposition patterns of the TFF AS01<sub>B</sub>/OVA/CMC<sub>1.9%</sub> powder in different  
 675 regions. The parameters were designed with the Taguchi array method. (C) The regional  
 676 deposition efficiency (RDP) of the 4 conditions in the middle and lower turbinate and the  
 677 nasopharynx regions. (D) The S/N ratio of each parameter at different levels.

678

679 The deposition pattern of the TFF AS01<sub>B</sub>/OVA/CMC<sub>1.9%</sub> powder in a nasal cast based on  
 680 the CT scan of a 7-year-old female is shown in **Fig. 12A-B**. The result showed that most  
 681 of the TFF AS01<sub>B</sub>/OVA/CMC<sub>1.9%</sub> powder was also deposited in the middle and lower  
 682 turbinate regions and the nasopharynx region. Compared to the results generated using the  
 683 adult nasal cast, the differences between different conditions were more significant in the

684 child nasal cast. For example, Run #1 resulted in the highest deposition percentage in the  
685 nasopharynx region (**Fig. 12B**), which was desirable for intranasal immunization. This was  
686 likely due to the smaller size/depth of the nasal cavity in children, making the effect of  
687 these conditions more pronounced. The RDP among 4 conditions ranged from 75.8% to  
688 88.8% (**Fig. 12C**), which were generally higher than that of the adult nasal cast. The  
689 calculated S/N ratios for all parameters indicated that the optimal condition for the  
690 deposition pattern was also: 0° for the coronal angle, 45° for the sagittal angle, and 0 LPM  
691 for the flow rate, which is the same as Run #1 (**Fig. 12D**). Different from the adult nasal  
692 cast, however, the order of the impact on RDP was: coronal angle > sagittal angle > flow  
693 rate.

694

695 Taken together, data in **Fig. 11** and **Fig. 12** showed that in both adult and child nasal casts,  
696 the optimal condition to deliver the TFF AS01<sub>B</sub>/OVA/CMC<sub>1.9%</sub> vaccine powder to the  
697 middle and lower turbinate and the nasopharynx region was 0° for the coronal angle, 45°  
698 for the sagittal angle, and 0 LPM for the flow rate. The insertion depth is expected to also  
699 significantly affect the deposition pattern of the TFF vaccine powder sprayed using the  
700 UDSP nasal device (Gao et al., 2020). In the present study, for the adult nasal cast, the  
701 insertion depth was 0.5 cm and 0.4 cm for the child nasal cast, so that all the parameters in  
702 the Taguchi L8 orthogonal array in **Table 1** can be accommodated. Due to the rigid  
703 structure of the 3D-printed nasal casts, the insertion depth could not be adjusted in a large  
704 interval. Further optimization of the insertion depth may be considered in the future.

705

706 **Fig. sup6A** showed the deposition percentages of the TFF AS01<sub>B</sub>/OVA/CMC<sub>1.9%</sub> vaccine  
707 powder directly in the nasopharynx region of a 48-year-old male nasal cast in 4 different

708 runs. The N/S ratios in **Fig. sup6B** indicated that the optimal condition for the TFF vaccine  
709 powder to be delivered directly to the nasopharynx region of the nasal cast based on the  
710 48-year-old male is: 0° for the coronal angle, 45° for the sagittal angle, and 10 LPM for the  
711 flow rate. The deposition pattern of the TFF AS01<sub>B</sub>/OVA/CMC<sub>1.9%</sub> vaccine powder at the  
712 optimal condition identified above is shown in **Fig. sup7**. The percentage of the powder  
713 deposited directly in the nasopharynx region was  $15.09 \pm 4.05\%$ .

714

715 **Fig. sup8A** showed the deposition percentages of the TFF AS01<sub>B</sub>/OVA/CMC<sub>1.9%</sub> vaccine  
716 powder directly in the nasopharynx region of the 7-year-old female nasal cast in 4 different  
717 runs. The N/S ratios in **Fig. sup8B** indicated that the optimal condition for the TFF vaccine  
718 powder to be delivered directly to the nasopharynx region of the nasal cast based on the 7-  
719 year-old female is 0° for the coronal angle, 45° for the sagittal angle, and 5 LPM for the  
720 flow rate. Even at 0° for the coronal angle, 45° for the sagittal angle, and 0 LPM flow rate,  
721 the percentage of the powder deposited directly in the nasopharynx region was  $35.49 \pm$   
722  $5.14\%$ . Therefore, if one only considers the TFF AS01<sub>B</sub>/OVA/CMC<sub>1.9%</sub> vaccine powder  
723 that is directly delivered into the nasopharynx region, where the Waldeyer's ring is located,  
724 then applying a flow rate, similar to applying the vaccine to a human subject while the  
725 human subject is inhaling, is expected to be beneficial, but there is also an increased chance  
726 for the powder to travel beyond the nasopharynx region into the trachea. Direct deposition  
727 of a vaccine to the nasopharynx region is important as the vaccine is expected to have a  
728 higher chance of reaching the lymphoid tissues (i.e., adenoids and tubal tonsils) in the  
729 Waldeyer's ring. If the vaccine is deposited in the posterior nasal cavity, it may ultimately  
730 reach the naso-oropharynx region because of the mucous blanket posterior movement, but  
731 the lymphoid tissues in the naso-oropharynx need to efficiently interact with the vaccine

732 or antigens bound to the mucus.

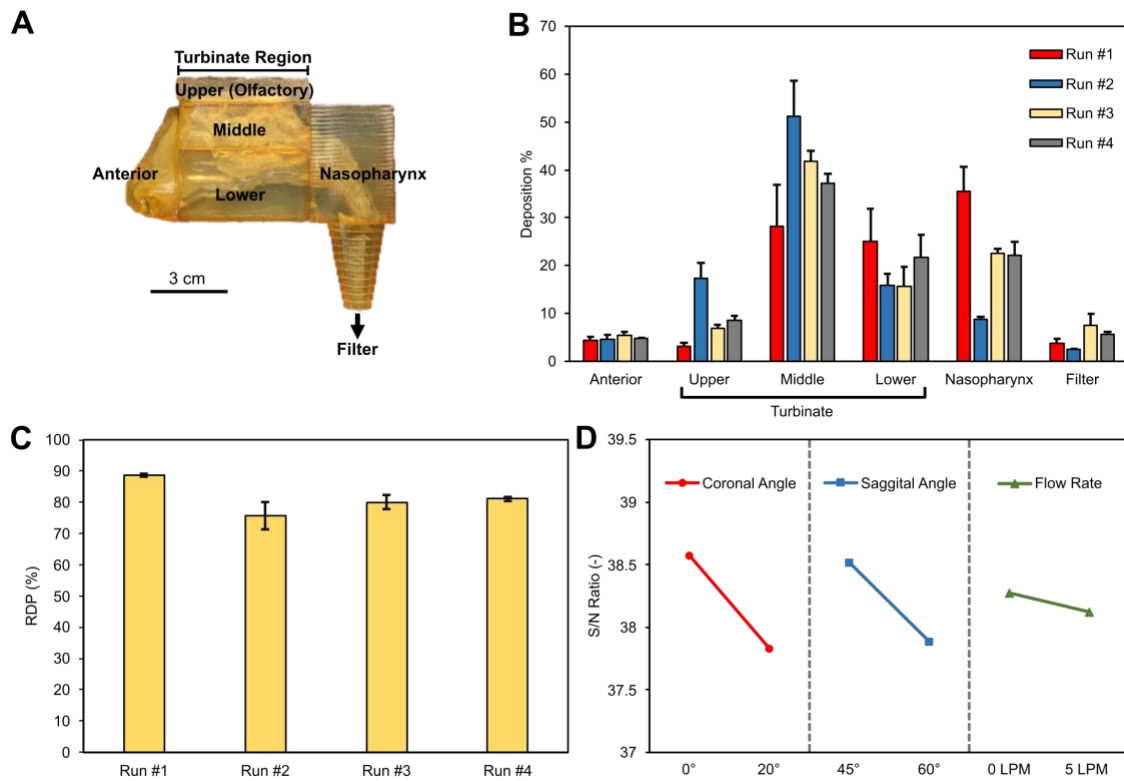

733

734 **Fig. 12.** Deposition pattern of TFF AS01<sub>B</sub>/OVA/CMC<sub>1.9%</sub> vaccine powder in a nasal cast  
735 based on a 7-year-old female. (A) A digital image of the nasal cast with different regions  
736 labeled. (B) The deposition patterns of the TFF AS01<sub>B</sub>/OVA/CMC<sub>1.9%</sub> powder in different  
737 regions. The parameters were designed with the Taguchi array method. (C) The regional  
738 deposition efficiency (RDP) of the 4 conditions in the middle and lower turbinate and the  
739 nasopharynx regions. (D) The S/N ratio of each parameter at different levels.

740

741 The results reported in this study showed that a protein antigen-based vaccine that is  
742 adjuvanted with the liposomal AS01<sub>B</sub> adjuvant and contains CMC as a mucoadhesive agent  
743 could be converted into a dry powder using the TFF technology and then delivered to the  
744 desired regions in nasal casts 3D printed based on the CT-scan images of human noses

745 using the UDSP nasal device. Besides the AS01<sub>B</sub>-adjuvanted vaccines, the TFF technology  
746 has been successfully applied to various other types of vaccines, including vaccines  
747 adjuvanted with aluminum salt (Alzhrani et al., 2021; Li et al., 2015; Thakkar et al., 2018),  
748 MF59 or AddaVax (AboulFotouh et al., 2022a), plasmid DNA vaccine (Xu et al., 2022),  
749 viral vector-based vaccines (Cui, unpublished data), and messenger RNA-lipid  
750 nanoparticle vaccines (Cui, unpublished data). In addition, both Gram-positive and Gram-  
751 negative bacteria in suspension can be converted to dry powders using the TFF technology  
752 (Wang et al., 2022). Therefore, it is expected that various other types of vaccines can be  
753 administered intranasally as TFF powders using the UDSP nasal device to target the  
754 vaccines to the lymphoid tissues in the nasopharynx region in humans. Of course, for  
755 different vaccines, additional optimization of the formulation and critical processing  
756 parameters will likely be needed.

757

758 For decades, there has been a strong interest in developing intranasal vaccines. However,  
759 as aforementioned, only a few nasal vaccines have received regulatory approval for human  
760 use around the world. Many nasal vaccine candidates that are safe and efficacious in  
761 preclinical studies often fail to move beyond phase 1 in clinical testing (Cai et al., 2022).  
762 For example, the ChAdOx1 nCoV-19 simian adenovirus-based COVID-19 vaccine that  
763 was effective in hamsters and non-human primates (NHP) when given intranasally failed  
764 to elicit consistent immune responses in humans (Madhavan et al., 2022). The authors  
765 hypothesized that the dosage form and the device used to administer the vaccine, both were  
766 not optimized for intranasal vaccination, may have contributed, at least in part, to the weak  
767 and inconsistent immune responses seen in humans (Madhavan et al., 2022), underscoring  
768 the significance of optimizing vaccine formulation and delivery device in nasal vaccine

769 development.

770

771 Nasal vaccines that are currently approved for human use around the world are liquid  
772 suspension or freeze-dried powder that must be reconstituted before administration. They  
773 are sprayed into the nostrils using a nasal spray system such as the BD Accuspray™.

774 Intranasal immunization using a vaccine dry powder is appealing, but a technology that  
775 can transform vaccines from liquid to a dry powder suitable for intranasal delivery, while  
776 preserving the physical and chemical properties and immunogenicity of the vaccines is

777 needed. Similarly, a dry powder delivery system that can deliver the vaccine powder to the  
778 desired region(s) of the human nasal cavity is also required because there has not been an  
779 approved nasal dry powder vaccine for human use yet. Since many intranasal vaccines

780 failed to move beyond phase 1 clinical trials (Cai et al., 2022; Xu et al., 2021b), the  
781 formulation of a vaccine intended for intranasal administration must be optimized, and only  
782 a device that can efficiently target the vaccine formulation to the desired region(s) in the

783 nasal cavity should be chosen. As aforementioned, in children and adults, the Waldeyer's  
784 ring in the naso-oropharynx region is the key lymphoid tissue in the nasal cavity. Therefore,  
785 it is ideal to deliver a vaccine powder directly to the nasopharynx region. If the vaccine is

786 delivered in the posterior nasal cavity and binds to the mucus, then it may be carried to the  
787 naso-oropharynx region by the mucous blanket posterior movement by means of ciliary  
788 clearance, wherein the vaccine may be taken up by the lymphoid tissues in the Waldeyer's

789 ring or cleared through the throat to the stomach and then degraded or deactivated there  
790 (Sahin-Yilmaz and Naclerio, 2011). It is possible, or perhaps likely, that some cells in the  
791 epithelium of the posterior nasal cavity covered by the mucous layer may be able to take

792 up the vaccine or the antigens, but the vaccine/antigen must penetrate through the mucous

793 layer efficiently and quickly as the mucous blanket posterior movement can clear inhaled  
794 particles from the nasal cavity in 10-20 min (Sahin-Yilmaz and Naclerio, 2011).

795

796 A vaccine that is administered/deposited in the region that is anterior to the lower turbinate  
797 will be transported anterior out of the nostrils. Testing vaccine powders and delivery  
798 devices directly in human subjects is ideal, but less practical. Nasal casts 3D printed based  
799 on the CT scan images of the noses of humans of different ages, such as the nasal casts  
800 used in the present study and the idealized nasal replica (Chen et al., 2020), provide a  
801 suitable alternative for vaccine powder optimization and dry powder delivery device  
802 selection. Formulations and devices selected based on nasal casts can then be validated in  
803 humans to verify the deposition of the vaccine powder to desired regions or sites before  
804 initiating clinical trials to test the safety and efficacy of new vaccine candidates.

805

806

807

808

809

810

811

812

813

814

815

816

#### 817 **4. Conclusion**

818 It is concluded that it is feasible to apply the TFF technology to convert vaccines such as  
819 the AS01<sub>B</sub>-adjuvanted OVA model vaccine with a proper mucoadhesive agent such as  
820 CMC into dry powders, and the resultant vaccine powders can be delivered to the desired  
821 regions of 3D printed human nasal casts using the UDSP nasal device. The type of the  
822 mucoadhesive agents and their concentration were critical so that the physical properties  
823 of the vaccine and the integrity of the antigen were preserved after the vaccine was  
824 subjected to the TFF technology. The mucoadhesive agent also affected the powder  
825 properties of the TFF vaccine powder. When sprayed using the UDSP nasal device, the  
826 TFF vaccine powders showed desirable particle size distribution, spray pattern and plum  
827 geometry. Importantly, spraying the vaccine powder with the UDSP nasal device did not  
828 negatively affect the antigen and the adjuvant. Finally, evaluation of the deposition patterns  
829 of TFF AS01<sub>B</sub>/OVA/CMC<sub>1.9%</sub> powder in both adult and child nasal casts showed that the  
830 optimal parameters for both nasal casts were: 0° for the coronal angle, 45° for the sagittal  
831 angle, and 0 LPM for the flow rate, and more than 80% of the powders were deposited in  
832 the middle and lower turbinate and the nasopharynx regions. If only the nasopharynx  
833 region is considered, then applying a flow rate was beneficial.

834

835

836

837

838

839

840



841 **ACKNOWLEDGEMENTS**

842 Z Cui and RO Williams III report financial support from TFF Pharmaceuticals, Inc. The  
843 UDSP device was generously provided by the AptarGroup, Inc. Y Yu was supported in  
844 part by the Y.L. Lin Hung Tai Education Foundation and the National Taiwan University.  
845 K AboulFotouh was supported in part by an Egyptian Government Fellowship. We thank  
846 Dr. Hugh Smyth in the College of Pharmacy at UT Austin for letting us use the laser  
847 sheet system in his laboratory to acquire the spray pattern and plume geometry data.

848

849 **DISCLOSURE OF CONFLICT OF INTEREST**

850 Z Cui reports a relationship with TFF Pharmaceuticals, Inc. that includes equity or stocks  
851 and research funding. RO Williams III reports a relationship with TFF Pharmaceuticals,  
852 Inc. that includes consulting or advisory, equity or stocks, and research funding. Z Cui  
853 and RO Williams III report a relationship with Via Therapeutics, LLC that includes  
854 equity. Financial conflict of interest management plans are available at UT Austin.

855

856 **CRedit Author Statement**

857

858 Y Yu: Conceptualization, Methodology, Investigation, Visualization, Formal analysis,  
859 Writing Original Draft; K AboulFotouh: Methodology, investigation; G Williams, J  
860 Suman, C Cano: Conceptualization, Resources, Writing-Review & Editing; Z Warnken:  
861 Methodology, investigation, Writing-Review & Editing; RO Williams III: Resources,  
862 Writing-Review & Editing, Funding acquisition. Z Cui: Conceptualization, Resources,  
863 Validation, Writing-Review & Editing, Supervision, Funding acquisition.

864

## 865 **5. References**

866 AboulFotouh, K., Uno, N., Xu, H., Moon, C., Sahakijpijarn, S., Christensen, D.J.,  
867 Davenport, G.J., Cano, C., Ross, T.M., Williams Iii, R.O., Cui, Z., 2022a. Formulation of  
868 dry powders of vaccines containing MF59 or AddaVax by Thin-Film Freeze-Drying:  
869 Towards a dry powder universal flu vaccine. *International Journal of Pharmaceutics* 624,  
870 122021.

871

872 AboulFotouh, K., Xu, H., Moon, C., Williams, R.O., 3rd, Cui, Z., 2022b. Development of  
873 (Inhalable) Dry Powder Formulations of AS01(B)-Containing Vaccines Using Thin-Film  
874 Freeze-Drying. *Int J Pharm* 622, 121825.

875

876 Alzhrani, R.F., Xu, H., Moon, C., Suggs, L.J., Williams, R.O., 3rd, Cui, Z., 2021. Thin-  
877 Film Freeze-Drying Is a Viable Method to Convert Vaccines Containing Aluminum Salts  
878 from Liquid to Dry Powder. *Methods Mol Biol* 2183, 489-498.

879

880 Baldrige, J.R., Yorgensen, Y., Ward, J.R., Ulrich, J.T., 2000. Monophosphoryl lipid A  
881 enhances mucosal and systemic immunity to vaccine antigens following intranasal  
882 administration. *Vaccine* 18, 2416-2425.

883

884 Beckett, S.T., Francesconi, M.G., Geary, P.M., Mackenzie, G., Maulny, A.P., 2006. DSC  
885 study of sucrose melting. *Carbohydr Res* 341, 2591-2599.

886

887 Bhandari, B.R., Hartel, R.W., 2002. Co-crystallization of Sucrose at High Concentration in  
888 the Presence of Glucose and Fructose. *Journal of Food Science* 67, 1797-1802.

889

890 Birkhoff, M., Leitz, M., Marx, D., 2009. Advantages of Intranasal Vaccination and  
891 Considerations on Device Selection. *Indian J Pharm Sci* 71, 729-731.

892

893 Cai, L., Xu, H., Cui, Z., 2022. Factors Limiting the Translatability of Rodent Model-Based  
894 Intranasal Vaccine Research to Humans. *AAPS PharmSciTech* 23, 191.

895

896 Chavda, V.P., Vora, L.K., Pandya, A.K., Patravale, V.B., 2021. Intranasal vaccines for  
897 SARS-CoV-2: From challenges to potential in COVID-19 management. *Drug Discov*  
898 *Today* 26, 2619-2636.

899

- 900 Chen, J.Z., Kiaee, M., Martin, A.R., Finlay, W.H., 2020. In vitro assessment of an idealized  
901 nose for nasal spray testing: Comparison with regional deposition in realistic nasal replicas.  
902 *International Journal of Pharmaceutics* 582, 119341.  
903
- 904 Davis, S.S., 2001. Nasal vaccines. *Advanced Drug Delivery Reviews* 51, 21-42.  
905
- 906 Debertin, A.S., Tschernig, T., Tönjes, H., Kleemann, W.J., Tröger, H.D., Pabst, R., 2003.  
907 Nasal-associated lymphoid tissue (NALT): frequency and localization in young children.  
908 *Clin Exp Immunol* 134, 503-507.  
909
- 910 Dekina, S., Romanovska, I., Ovsepyan, A., Tkach, V., Muratov, E., 2016.  
911 Gelatin/carboxymethyl cellulose mucoadhesive films with lysozyme: Development and  
912 characterization. *Carbohydr Polym* 147, 208-215.  
913
- 914 Engstrom, J.D., Lai, E.S., Ludher, B.S., Chen, B., Milner, T.E., Williams, R.O., 3rd, Kitto,  
915 G.B., Johnston, K.P., 2008. Formation of stable submicron protein particles by thin film  
916 freezing. *Pharm Res* 25, 1334-1346.  
917
- 918 Flood, A., Estrada, M., McAdams, D., Ji, Y., Chen, D., 2016. Development of a Freeze-  
919 Dried, Heat-Stable Influenza Subunit Vaccine Formulation. *PLoS One* 11, e0164692.  
920
- 921 Gao, M., Shen, X., Mao, S., 2020. Factors influencing drug deposition in the nasal cavity  
922 upon delivery via nasal sprays. *Journal of Pharmaceutical Investigation* 50, 251-259.  
923
- 924 Gasparini, C., Acunzo, M., Biuso, A., Roncaglia, S., Migliavacca, F., Borriello, C.R.,  
925 Bertolini, C., Allen, M.R., Orenti, A., Boracchi, P., Zuccotti, G.V., 2021. Nasal spray live  
926 attenuated influenza vaccine: the first experience in Italy in children and adolescents during  
927 the 2020-21 season. *Ital J Pediatr* 47, 225.  
928
- 929 Ghani, J.A., Choudhury, I.A., Hassan, H.H., 2004. Application of Taguchi method in the  
930 optimization of end milling parameters. *Journal of Materials Processing Technology* 145,  
931 84-92.  
932
- 933 Grabovac, V., Guggi, D., Bernkop-Schnürch, A., 2005. Comparison of the mucoadhesive  
934 properties of various polymers. *Adv Drug Deliv Rev* 57, 1713-1723.  
935

- 936 Hufnagel, S., Sahakijpijarn, S., Moon, C., Cui, Z., Williams III, R.O., 2022. The  
937 development of thin-film freezing and its application to improve delivery of biologics as  
938 dry powder aerosols. *KONA Powder and Particle Journal*, 2022010.  
939
- 940 Kesavan, K., Nath, G., Pandit, J.K., 2010. Sodium alginate based mucoadhesive system for  
941 gatifloxacin and its in vitro antibacterial activity. *Sci Pharm* 78, 941-957.  
942
- 943 Li, X., Thakkar, S.G., Ruwona, T.B., Williams, R.O., Cui, Z., 2015. A method of  
944 lyophilizing vaccines containing aluminum salts into a dry powder without causing particle  
945 aggregation or decreasing the immunogenicity following reconstitution. *Journal of*  
946 *Controlled Release* 204, 38-50.  
947
- 948 Lu, Y., Thomas, L.C., Jerrell, J.P., Cadwallader, K.R., Schmidt, S.J., 2017. Investigating  
949 the thermal decomposition differences between beet and cane sucrose sources. *Journal of*  
950 *Food Measurement and Characterization* 11, 1640-1653.  
951
- 952 Madhavan, M., Ritchie, A.J., Aboagye, J., Jenkin, D., Provstgaard-Morys, S., Tabet, I.,  
953 Woods, D., Davies, S., Baker, M., Platt, A., Flaxman, A., Smith, H., Belij-Rammerstorfer,  
954 S., Wilkins, D., Kelly, E.J., Villafana, T., Green, J.A., Poulton, I., Lambe, T., Hill, A.V.S.,  
955 Ewer, K.J., Douglas, A.D., 2022. Tolerability and immunogenicity of an intranasally-  
956 administered adenovirus-vectored COVID-19 vaccine: An open-label partially-  
957 randomised ascending dose phase I trial. *eBioMedicine*, 104298.  
958
- 959 Ortiz, J.R., Goswami, D., Lewis, K.D., Sharmeen, A.T., Ahmed, M., Rahman, M., Rahman,  
960 M.Z., Feser, J., Neuzil, K.M., Brooks, W.A., 2015. Safety of Russian-backbone seasonal  
961 trivalent, live-attenuated influenza vaccine in a phase II randomized placebo-controlled  
962 clinical trial among children in urban Bangladesh. *Vaccine* 33, 3415-3421.  
963
- 964 Overhoff, K.A., Johnston, K.P., Tam, J., Engstrom, J., Williams, R.O., 2009. Use of thin  
965 film freezing to enable drug delivery: a review. *Journal of Drug Delivery Science and*  
966 *Technology* 19, 89-98.  
967
- 968 Sahin-Yilmaz, A., Naclerio, R.M., 2011. Anatomy and physiology of the upper airway.  
969 *Proc Am Thorac Soc* 8, 31-39.  
970
- 971 Sasaki, S., Hamajima, K., Fukushima, J., Ihata, A., Ishii, N., Gorai, I., Hirahara, F., Mohri,

- 972 H., Okuda, K., 1998a. Comparison of intranasal and intramuscular immunization against  
973 human immunodeficiency virus type 1 with a DNA-monophosphoryl lipid A adjuvant  
974 vaccine. *Infection and immunity* 66, 823-826.  
975
- 976 Sasaki, S., Sumino, K., Hamajima, K., Fukushima, J., Ishii, N., Kawamoto, S., Mohri, H.,  
977 Kensil, C.R., Okuda, K., 1998b. Induction of systemic and mucosal immune responses to  
978 human immunodeficiency virus type 1 by a DNA vaccine formulated with QS-21 saponin  
979 adjuvant via intramuscular and intranasal routes. *Journal of virology* 72, 4931-4939.  
980
- 981 Sato-Kaneko, F., Yao, S., Lao, F.S., Sako, Y., Jin, J., Shukla, N.M., Cottam, H.B., Chan,  
982 M., Belsuzarri, M.M., Carson, D.A., Hayashi, T., 2022. A Dual Adjuvant System for  
983 Intranasal Boosting of Local and Systemic Immunity for Influenza Vaccination. *Vaccines*  
984 10, 1694.  
985
- 986 Sogias, I.A., Williams, A.C., Khutoryanskiy, V.V., 2008. Why is chitosan mucoadhesive?  
987 *Biomacromolecules* 9, 1837-1842.  
988
- 989 Suryadevara, M., Domachowske, J.B., 2014. Quadrivalent influenza vaccine in the United  
990 States. *Hum Vaccin Immunother* 10, 596-599.  
991
- 992 te Booy, M.P., de Ruiter, R.A., de Meere, A.L., 1992. Evaluation of the physical stability  
993 of freeze-dried sucrose-containing formulations by differential scanning calorimetry.  
994 *Pharm Res* 9, 109-114.  
995
- 996 Thakkar, S.G., Warnken, Z.N., Alzhrani, R.F., Valdes, S.A., Aldayel, A.M., Xu, H.,  
997 Williams, R.O., Cui, Z., 2018. Intranasal immunization with aluminum salt-adjuvanted dry  
998 powder vaccine. *Journal of Controlled Release* 292, 111-118.  
999
- 1000 Trenkel, M., Scherließ, R., 2021. Nasal Powder Formulations: In-Vitro Characterisation of  
1001 the Impact of Powders on Nasal Residence Time and Sensory Effects. *Pharmaceutics* 13,  
1002 385.  
1003
- 1004 Wang, J.-L., Kuang, M., Xu, H., Williams, R.O., Cui, Z., 2022. Accelerated mass transfer  
1005 from frozen thin films during thin-film freeze-drying. *bioRxiv*, 2022.2004.2016.488553.  
1006
- 1007 Wang, J.L., Hanafy, M.S., Xu, H., Leal, J., Zhai, Y., Ghosh, D., Williams Iii, R.O., David

1008 Charles Smyth, H., Cui, Z., 2021. Aerosolizable siRNA-encapsulated solid lipid  
1009 nanoparticles prepared by thin-film freeze-drying for potential pulmonary delivery. *Int J*  
1010 *Pharm* 596, 120215.  
1011  
1012 Warnken, Z.N., Smyth, H.D.C., Davis, D.A., Weitman, S., Kuhn, J.G., Williams, R.O.,  
1013 2018. Personalized Medicine in Nasal Delivery: The Use of Patient-Specific  
1014 Administration Parameters To Improve Nasal Drug Targeting Using 3D-Printed Nasal  
1015 Replica Casts. *Molecular Pharmaceutics* 15, 1392-1402.  
1016  
1017 Xu, H., Bhowmik, T., Gong, K., Huynh, T.N.A., Williams, R.O., Cui, Z., 2021a. Thin-film  
1018 freeze-drying of a bivalent Norovirus vaccine while maintaining the potency of both  
1019 antigens. *International Journal of Pharmaceutics* 609, 121126.  
1020  
1021 Xu, H., Cai, L., Hufnagel, S., Cui, Z., 2021b. Intranasal vaccine: Factors to consider in  
1022 research and development. *International Journal of Pharmaceutics* 609, 121180.  
1023  
1024 Xu, H., Moon, C., Sahakijpijarn, S., Dao, H.M., Alzhrani, R.F., Wang, J.-I., Williams, R.O.,  
1025 Cui, Z., 2022. Aerosolizable plasmid DNA dry powders engineered by thin-film freezing.  
1026 *bioRxiv*, 2022.2010.2003.510625.  
1027  
1028 Zhang, Y., Soto, M., Ghosh, D., Williams, R.O., 2021. Manufacturing Stable Bacteriophage  
1029 Powders by Including Buffer System in Formulations and Using Thin Film Freeze-drying  
1030 Technology. *Pharmaceutical Research* 38, 1793-1804.  
1031

1032

## Supplementary Material

1033

1034 **S1. Preparation of the OVA-FITC.** OVA and (240 mg) and FITC (12 mg) were dissolved  
1035 in 60 mL of 0.1 M sodium carbonate/bicarbonate solution (pH = 9). The mixture was stirred  
1036 overnight at room temperature. After the reaction, the buffer and the unreacted FITC were  
1037 removed by centrifugation with 30,000 MWCO centrifugal filter tubes from Millipore  
1038 (Grand Island, NY, USA). The FITC-OVA was then washed 4 times with 20 mL of PBS.  
1039 To purify the FITC-OVA, the mixture was further centrifuged with the 100,000 MWCO  
1040 centrifugal filter tubes, and the filtrate (i.e., OVA-FITC in PBS) was collected.

1041

1042

1043

1044

1045

1046

1047

1048

1049

1050

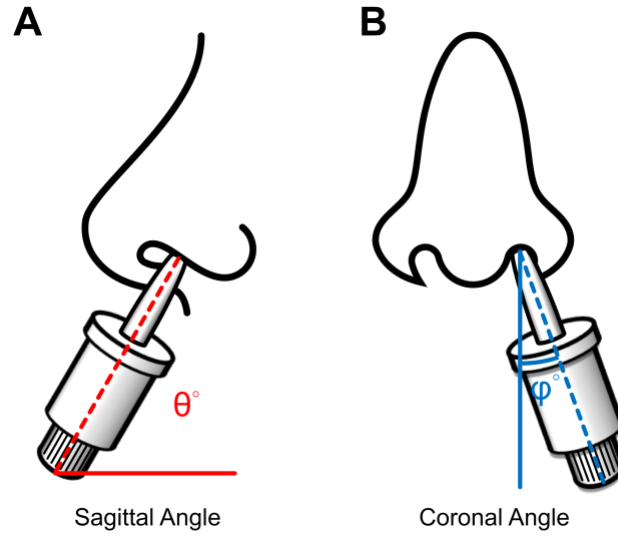

1051

1052

**Fig. sup1.** The definition of the coronal angle and the sagittal angle.

1053

1054

1055

1056

1057

1058

1059

1060

1061



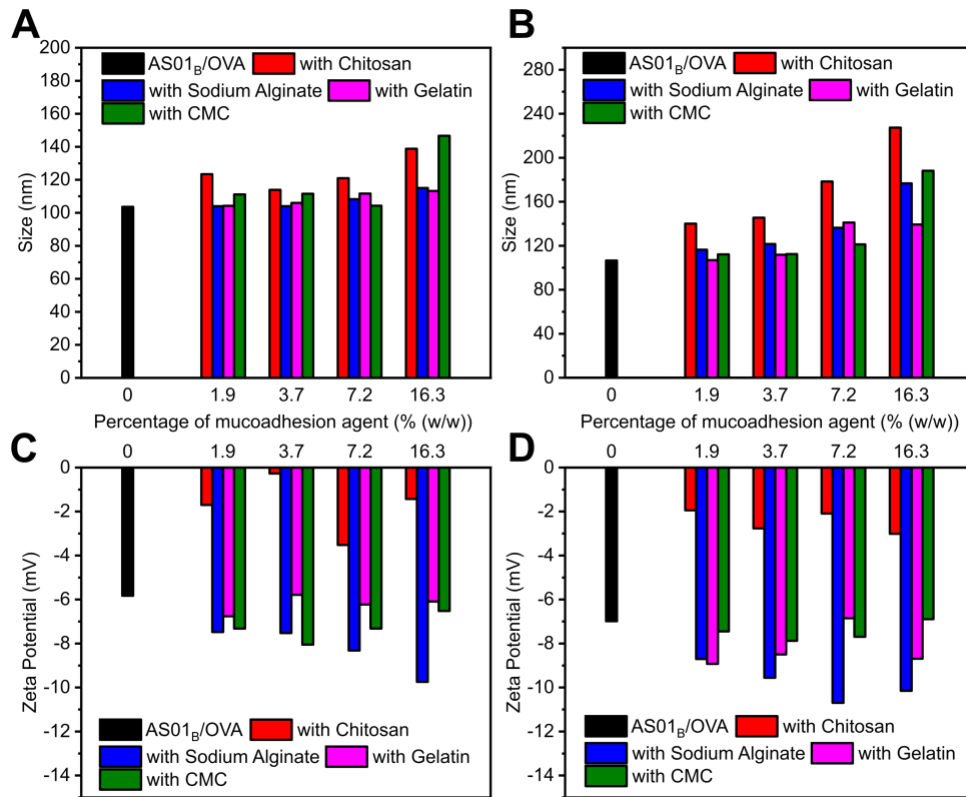

1062

1063 **Fig. sup2.** Particle size and zeta potential of AS01<sub>B</sub>/OVA without or with different  
1064 concentrations of mucoadhesive agents before (A, C) and after being subjected to thin-  
1065 film freeze-drying (B, D) (n = 1).

1066

1067

1068

1069

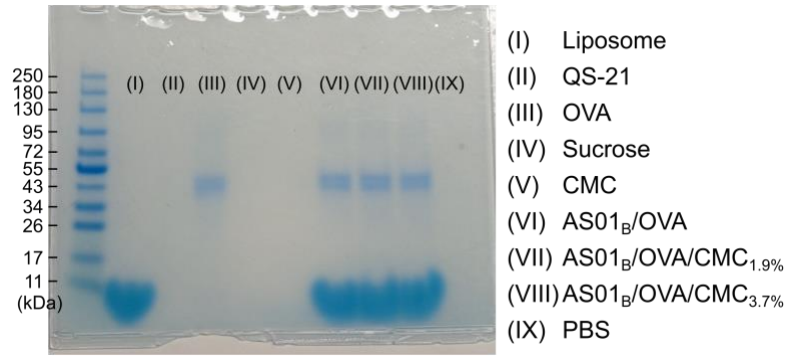

1070

1071 **Fig. sup3.** SDS-PAGE images of the AS01<sub>B</sub>/OVA vaccine with 0, 1.9, and 3.7% of CMC  
1072 and their individual component (i.e., liposome, QS21, OVA, sucrose, CMC, PBS).

1073

1074

1075

1076

1077

1078

1079

1080

1081

1082

1083

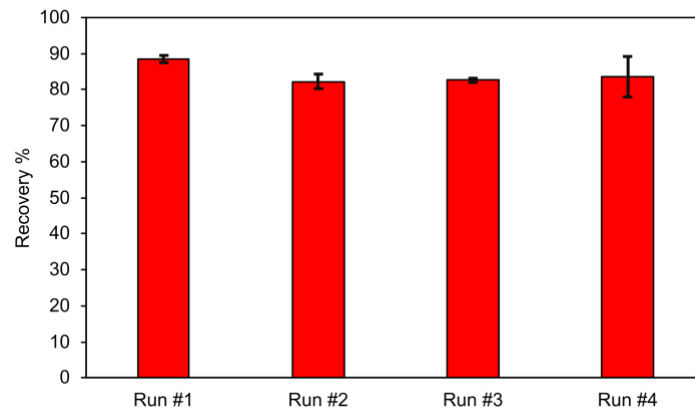

1084

1085 **Fig. sup4.** The recovery percentage of the TFF AS01<sub>B</sub>/OVA/CMC<sub>1.9%</sub> vaccine powder in

1086 the 48-year-old male nasal cast.

1087

1088

1089

1090

1091

1092

1093

1094

1095

1096

1097

1098

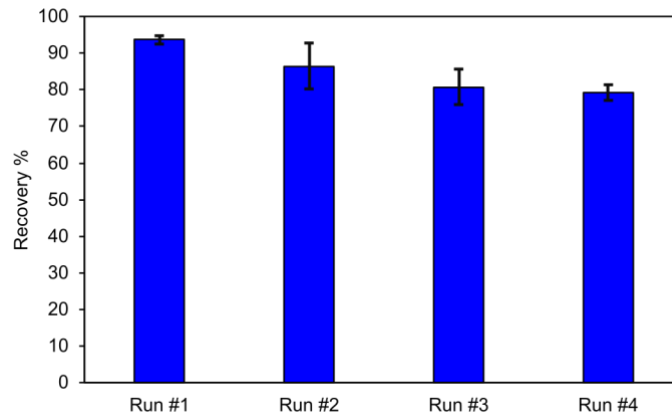

1099

1100 **Fig. sup5.** The recovery percentage of the TFF AS01<sub>B</sub>/OVA/CMC<sub>1.9%</sub> vaccine powder in

1101 the 7-year-old female nasal cast.

1102

1103

1104

1105

1106

1107

1108

1109

1110

1111

1112

1113

1114

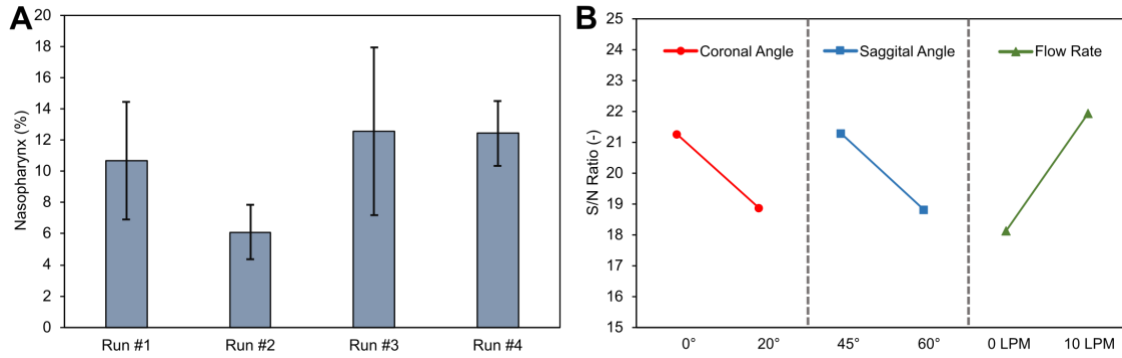

1115

1116 **Fig. sup6. (A)** The deposition percentage of the TFF AS01<sub>B</sub>/OVA/CMC<sub>1.9%</sub> vaccine

1117 powder in the nasopharynx region of a 48-year-old male nasal cast. **(B)** The S/N ratio of

1118 each parameter at different levels.

1119

1120

1121

1122

1123

1124

1125

1126

1127

1128

1129

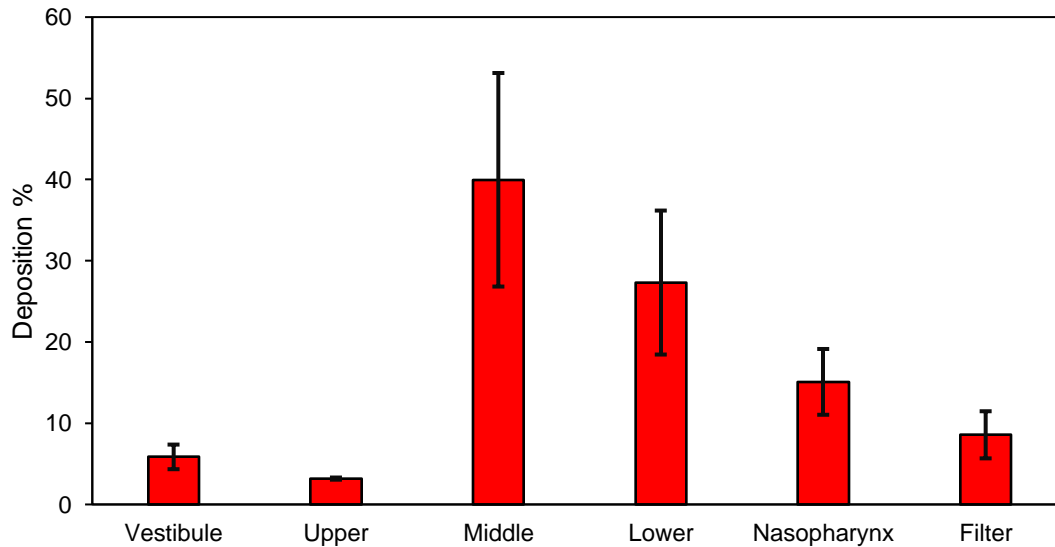

1130

1131 **Fig. sup7.** The deposition percentage of the TFF AS01<sub>B</sub>/OVA/CMC<sub>1.9%</sub> vaccine powder  
1132 in the nasopharynx region of a 48-year-old male nasal cast when applied using a UDSP  
1133 nasal device at the following condition: coronal angle = 0°, sagittal angle = 45°, flow rate  
1134 = 10 LPM.

1135

1136

1137

1138

1139

1140

1141

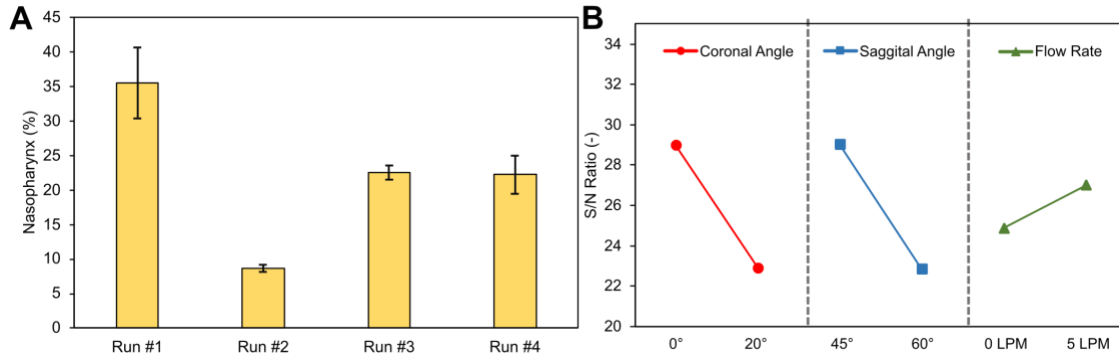

1142

1143 **Fig. sup8.** (A) The deposition percentage of the TFF AS01<sub>B</sub>/OVA/CMC<sub>1.9%</sub> vaccine

1144 powder in the nasopharynx region of a 7-year-old female nasal cast. (B) The S/N ratio of

1145 each parameter at different levels.
